# Supplementary figures and images for: Using light and X-ray scattering to untangle complex neuronal orientations and validate diffusion MRI
Source: eLife journal article supplement (doi:10.7554/elife.84024), 2023-05-11

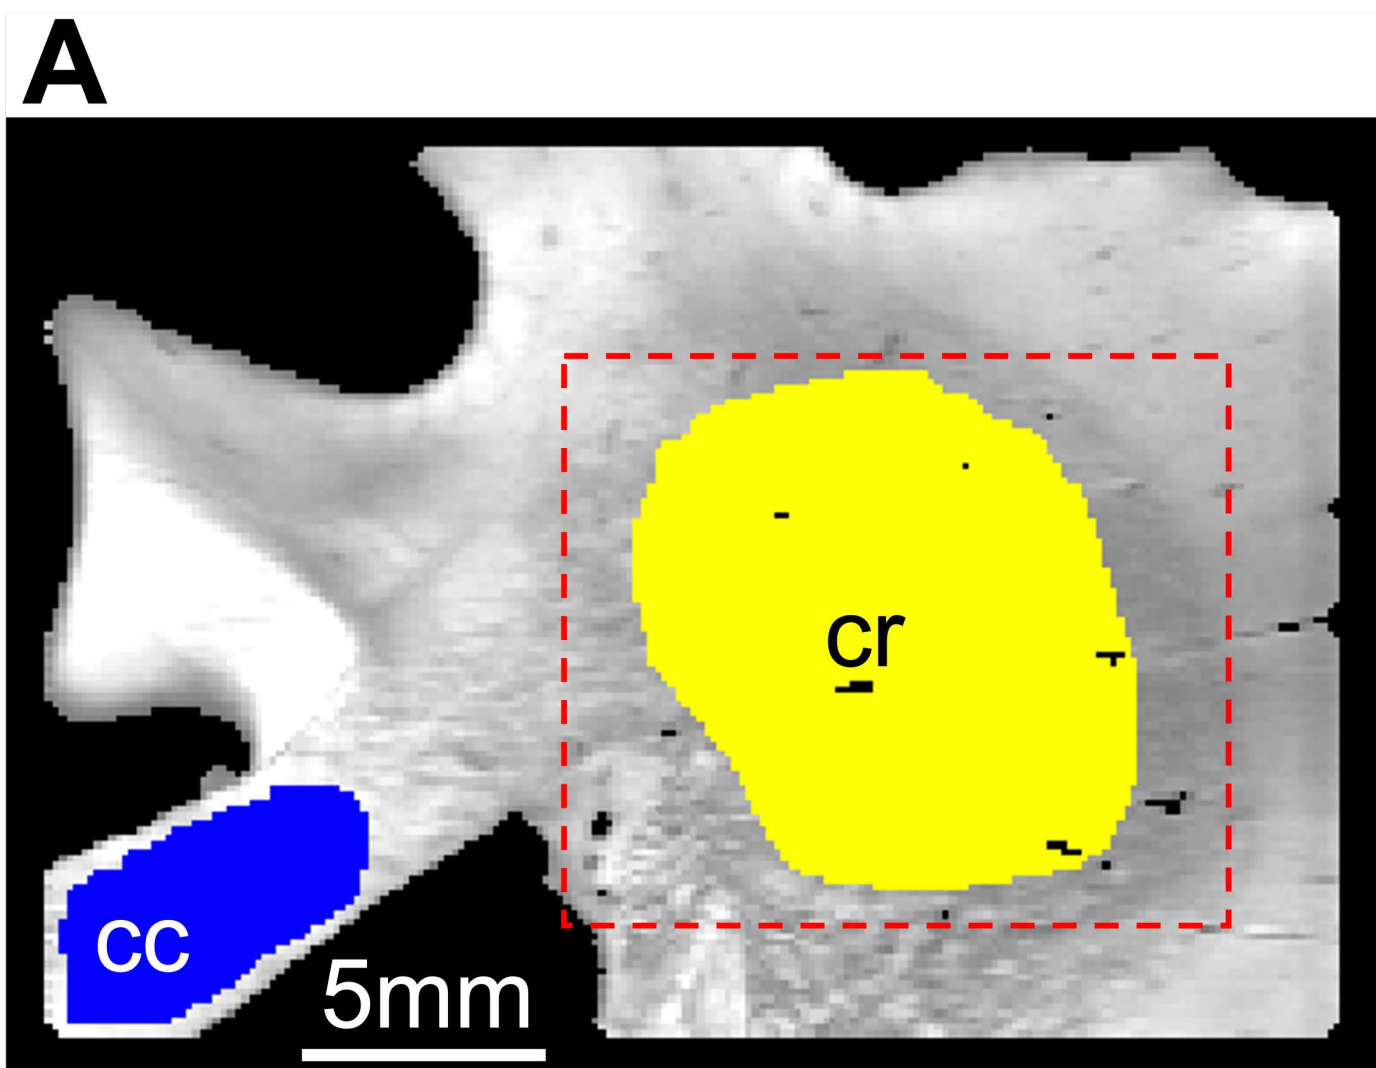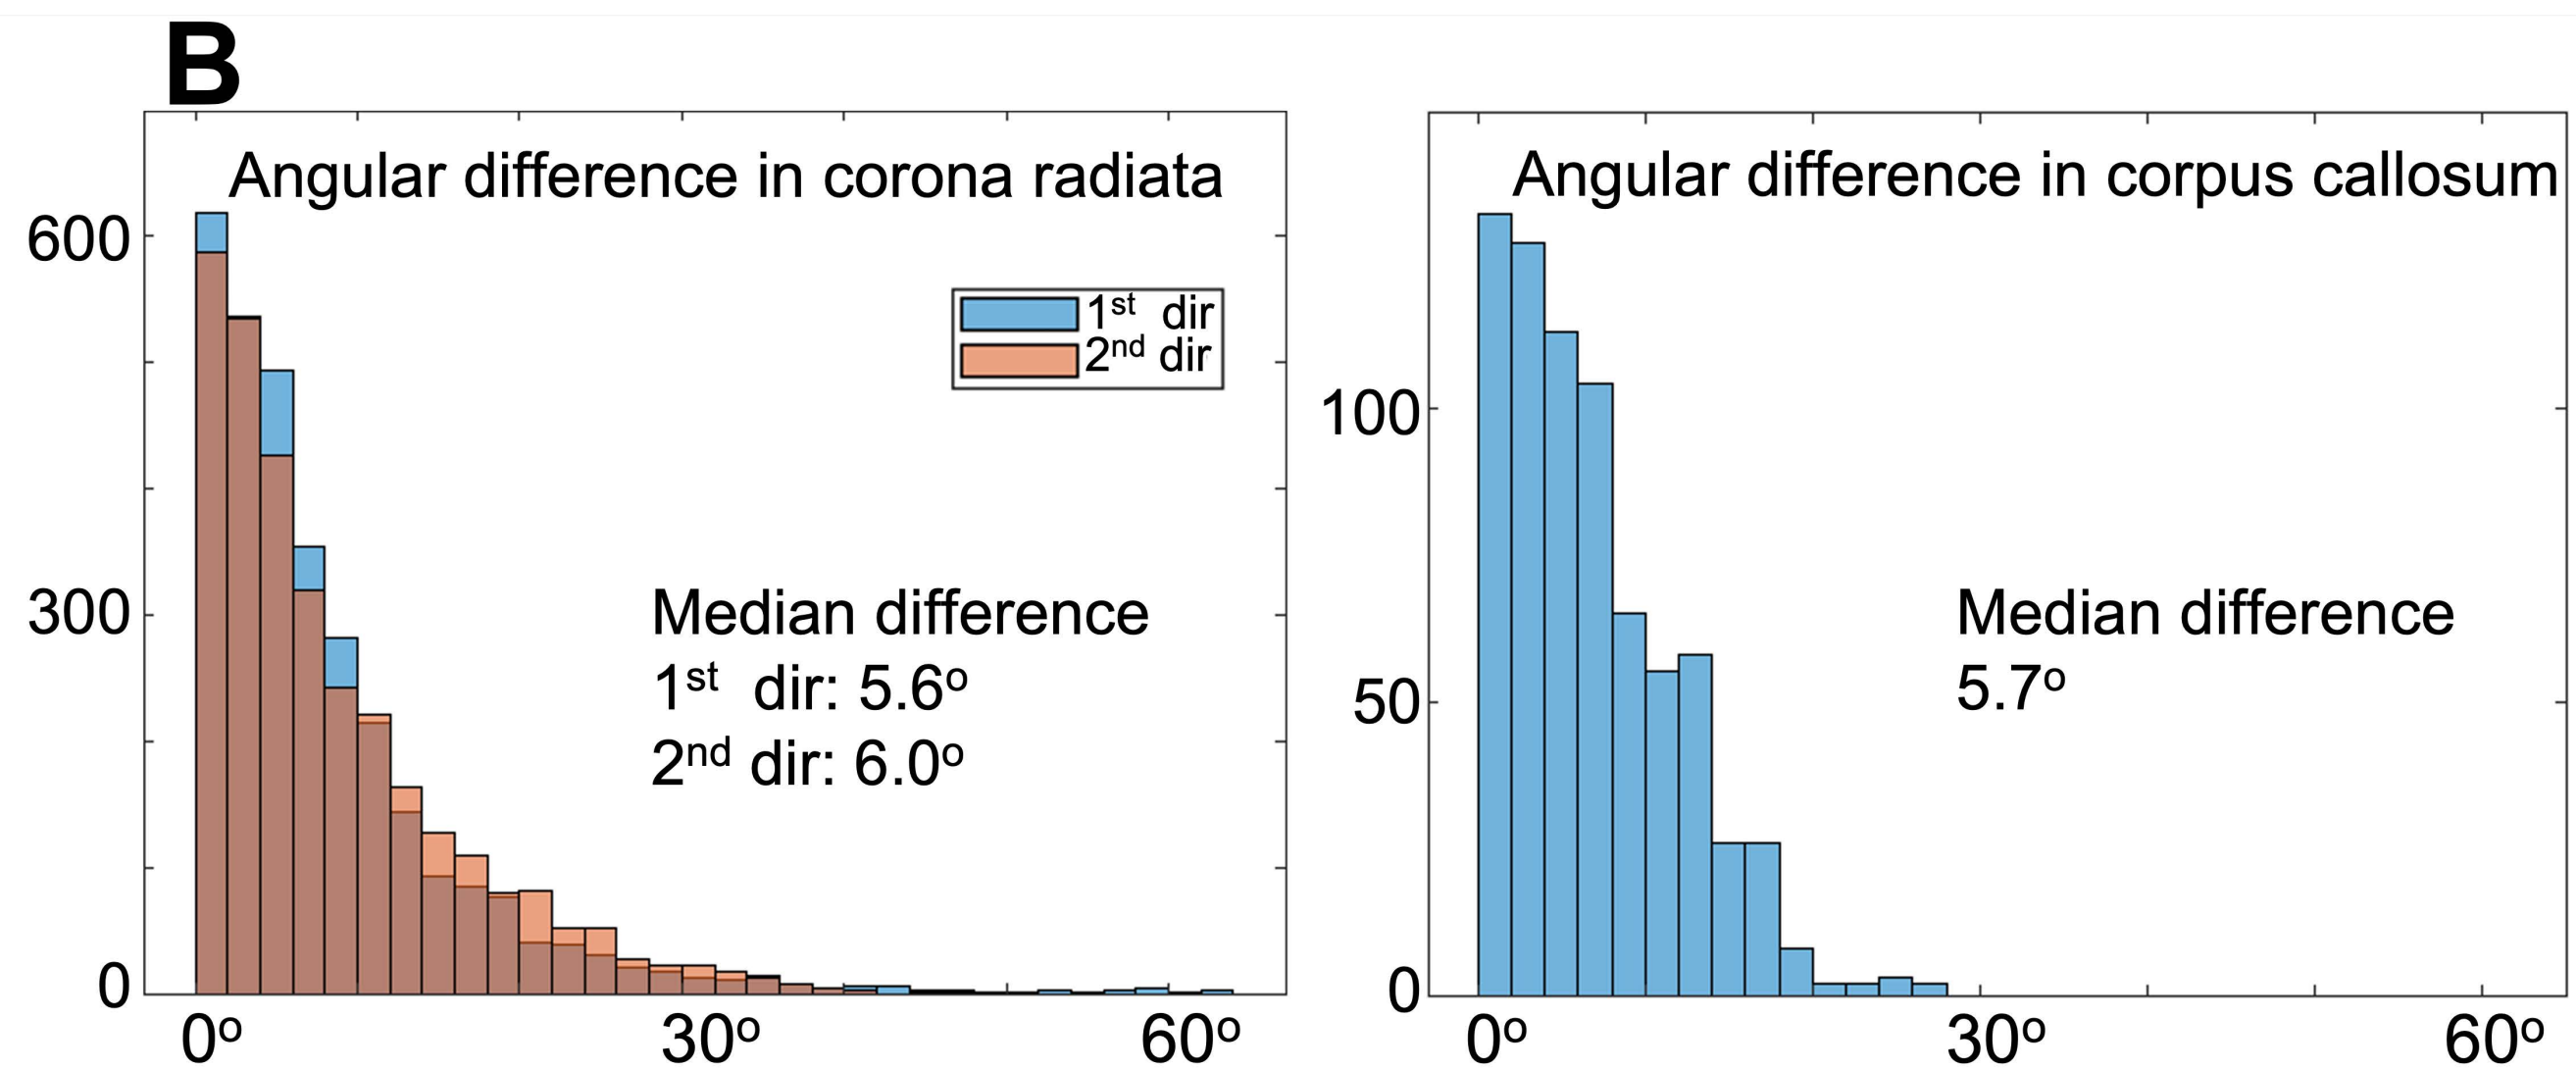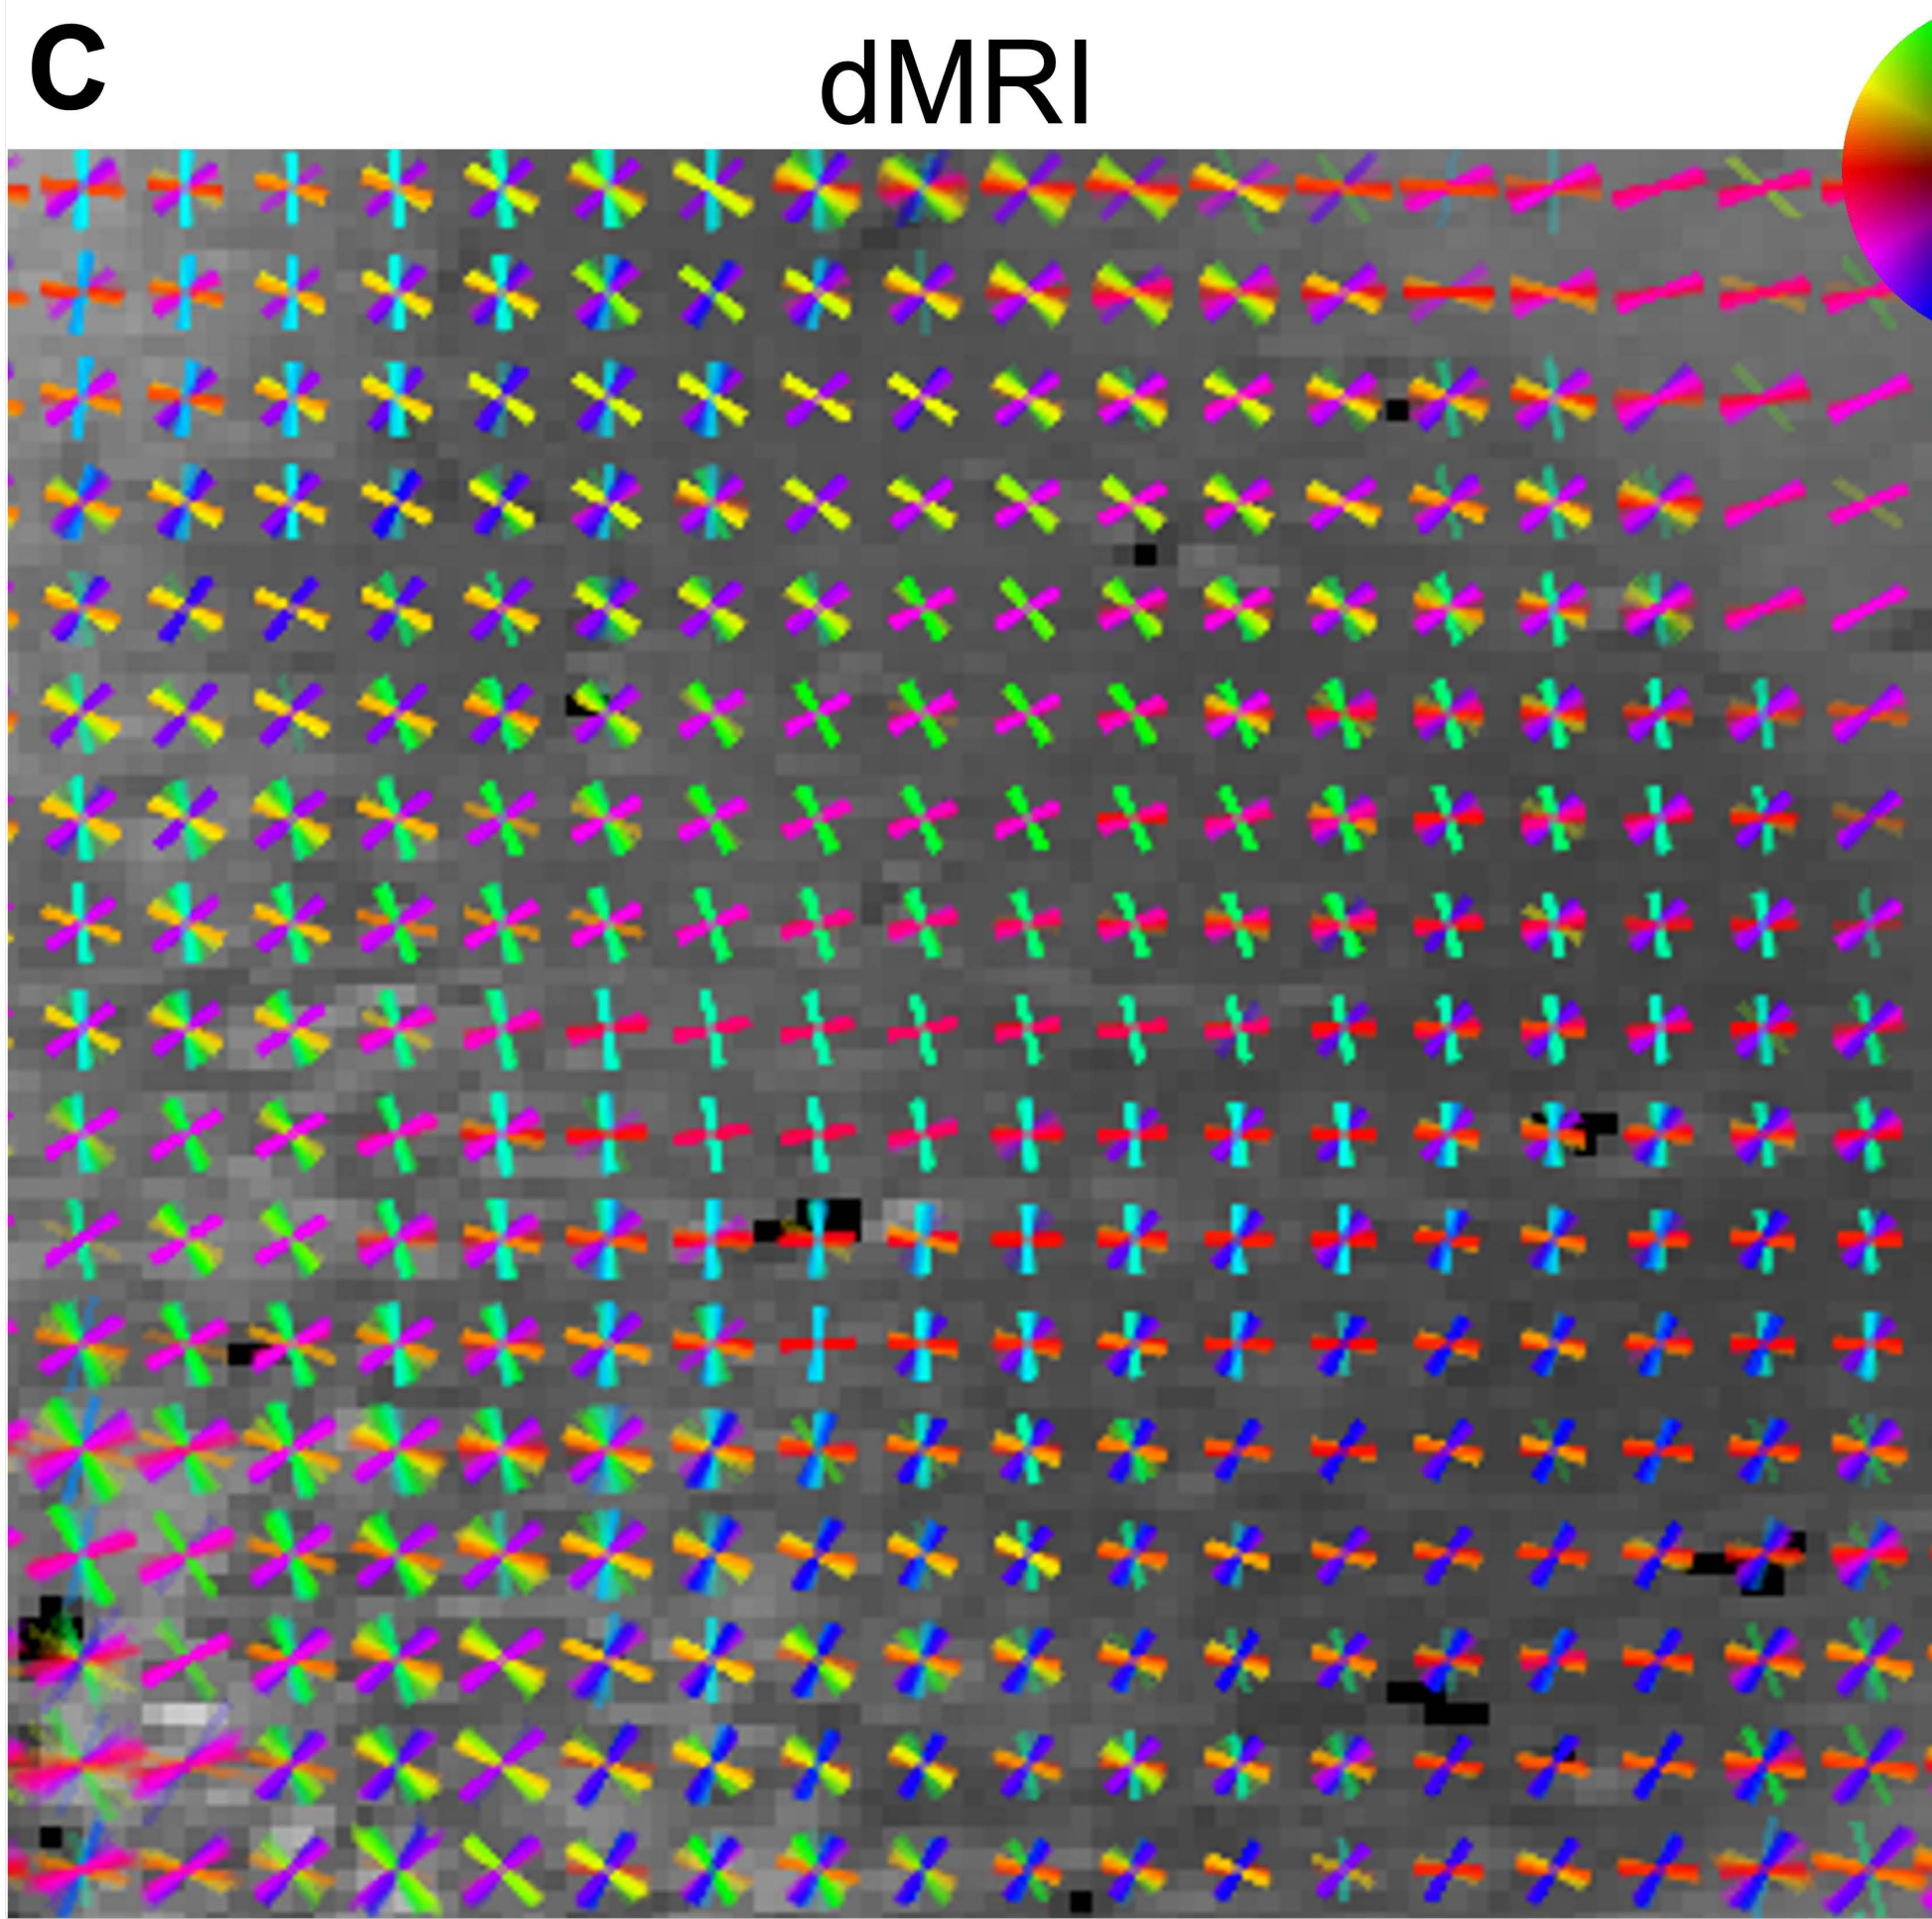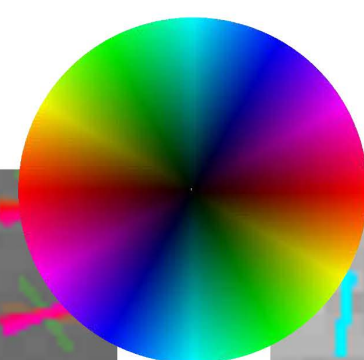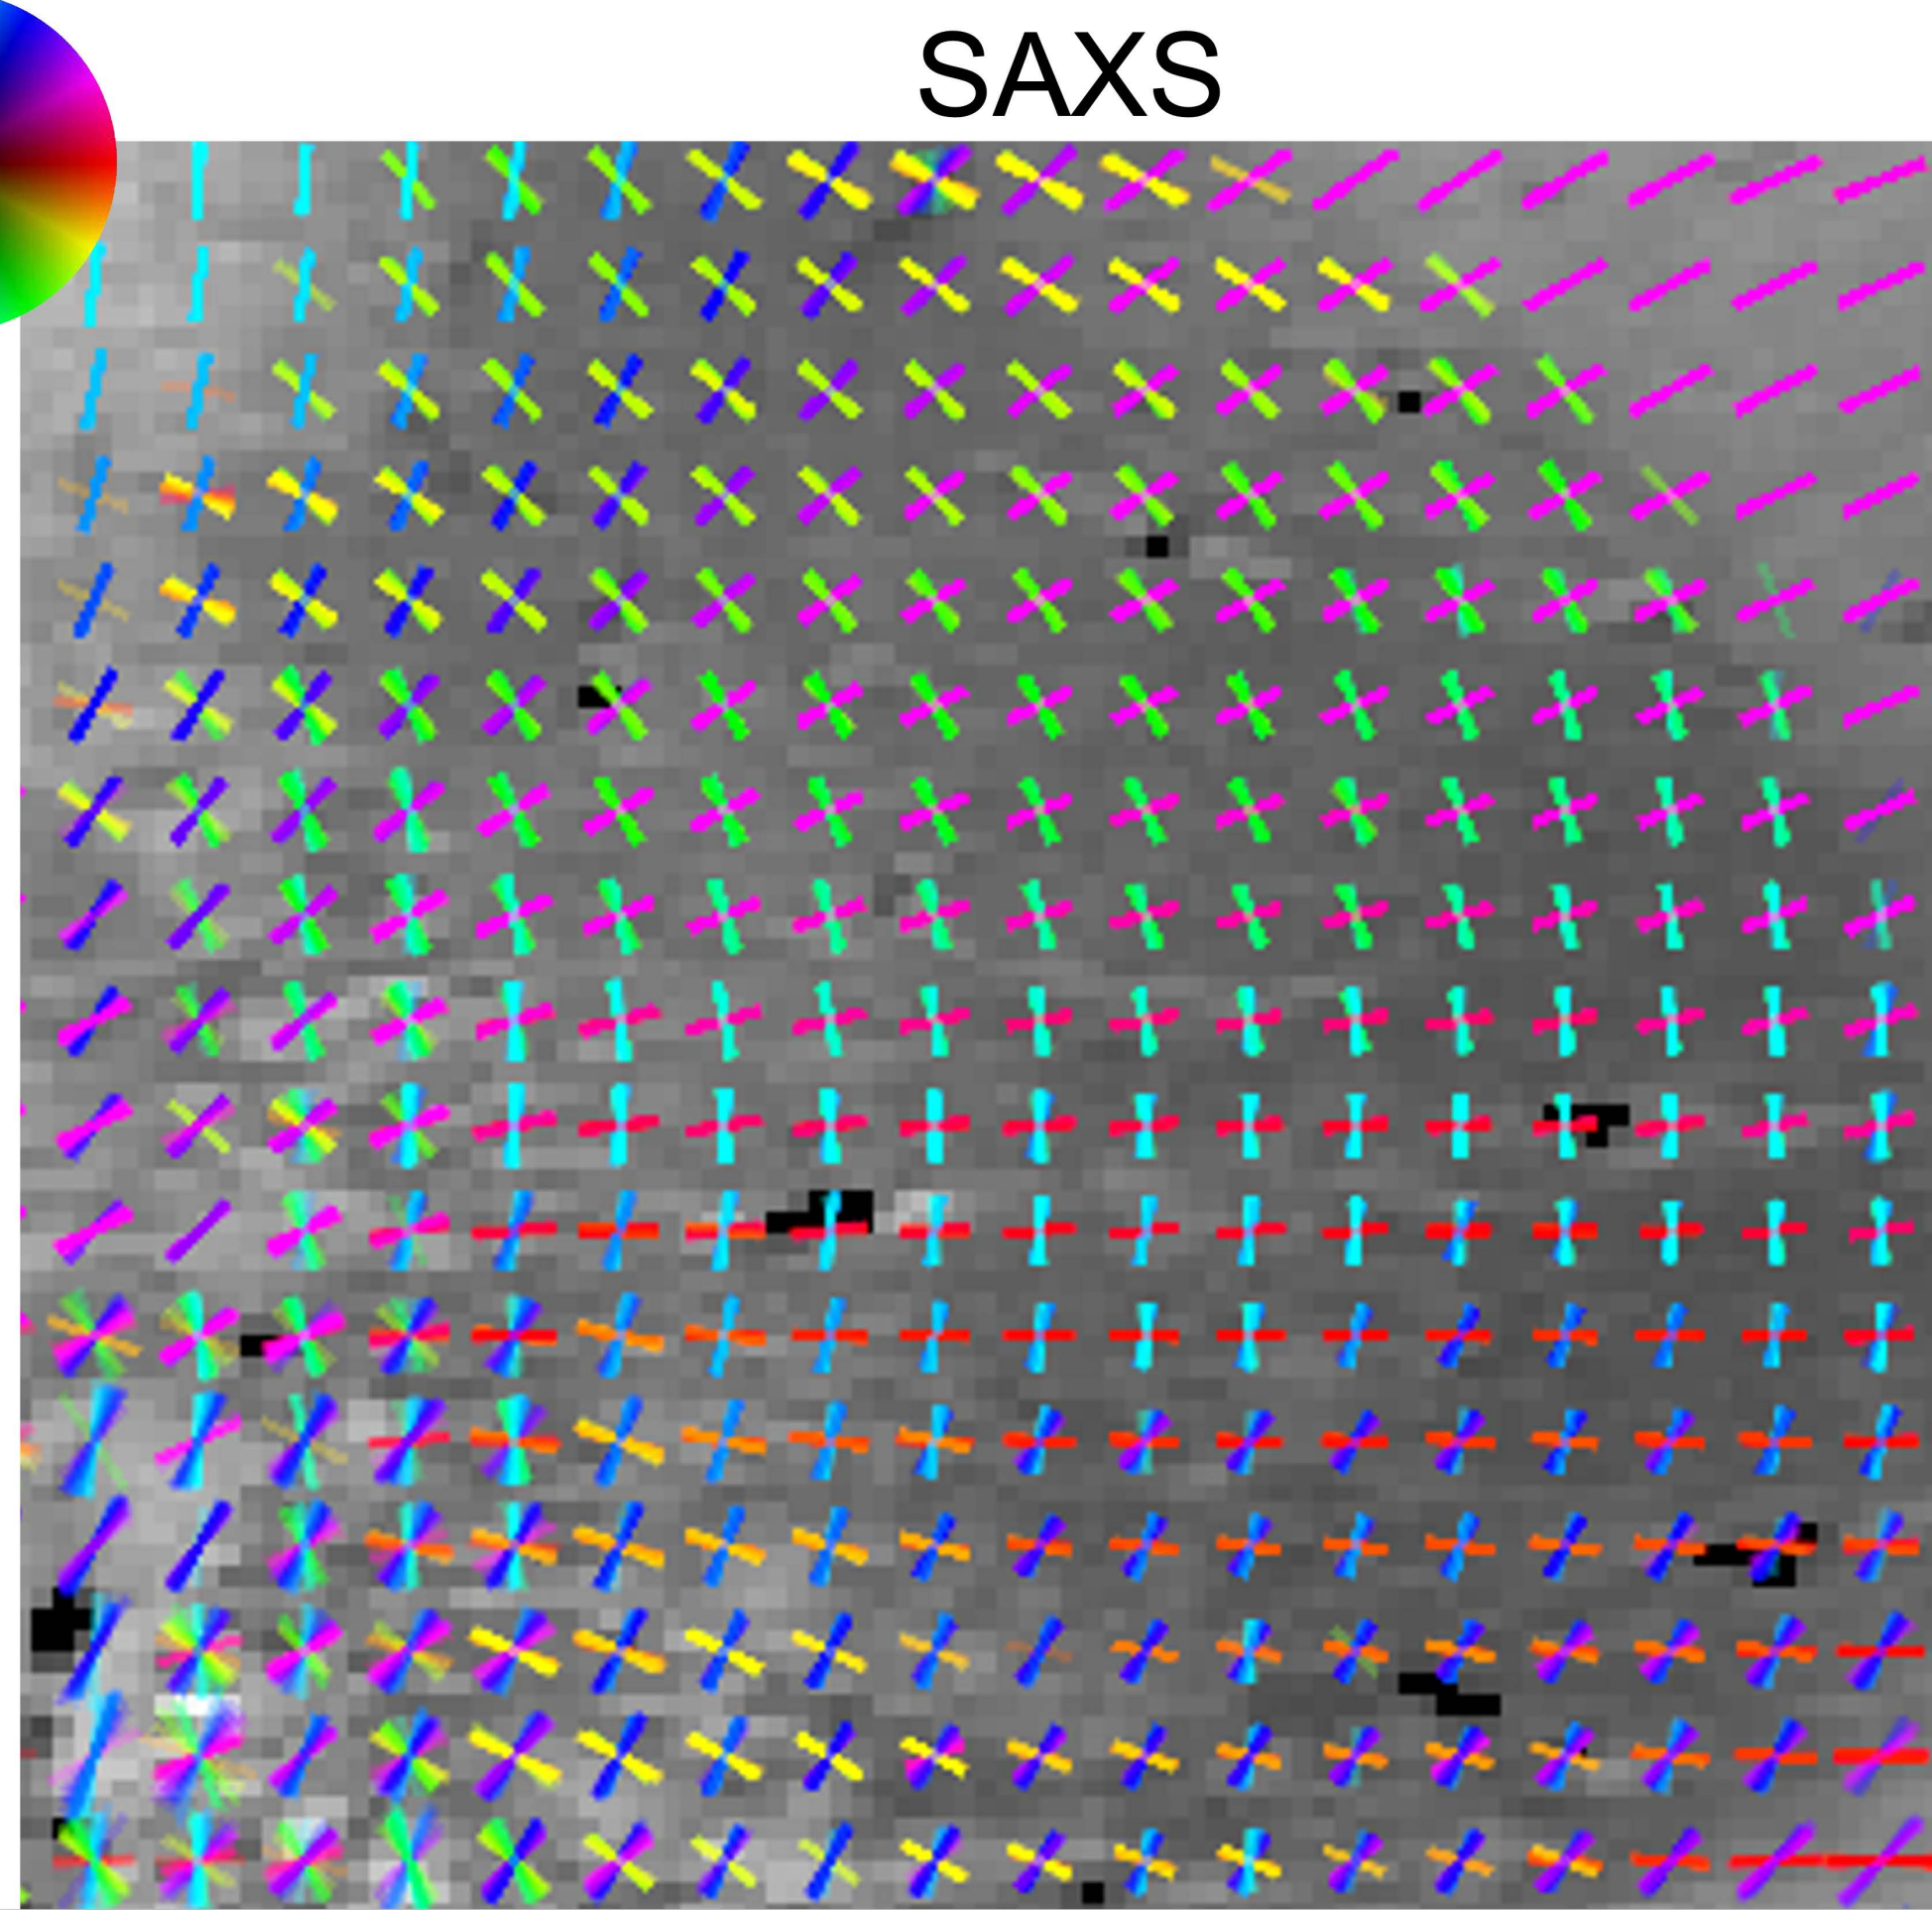

Supplement: supp [file elife-84024-supp-v1.zip]

# SAXS

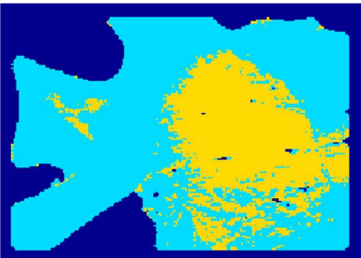

# dMRI

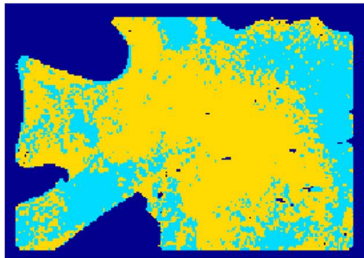

Voxels with:

Single fibers

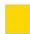

Crossing fibers

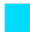

Supplement: supp [file elife-84024-supp-v1.zip]

SAXS

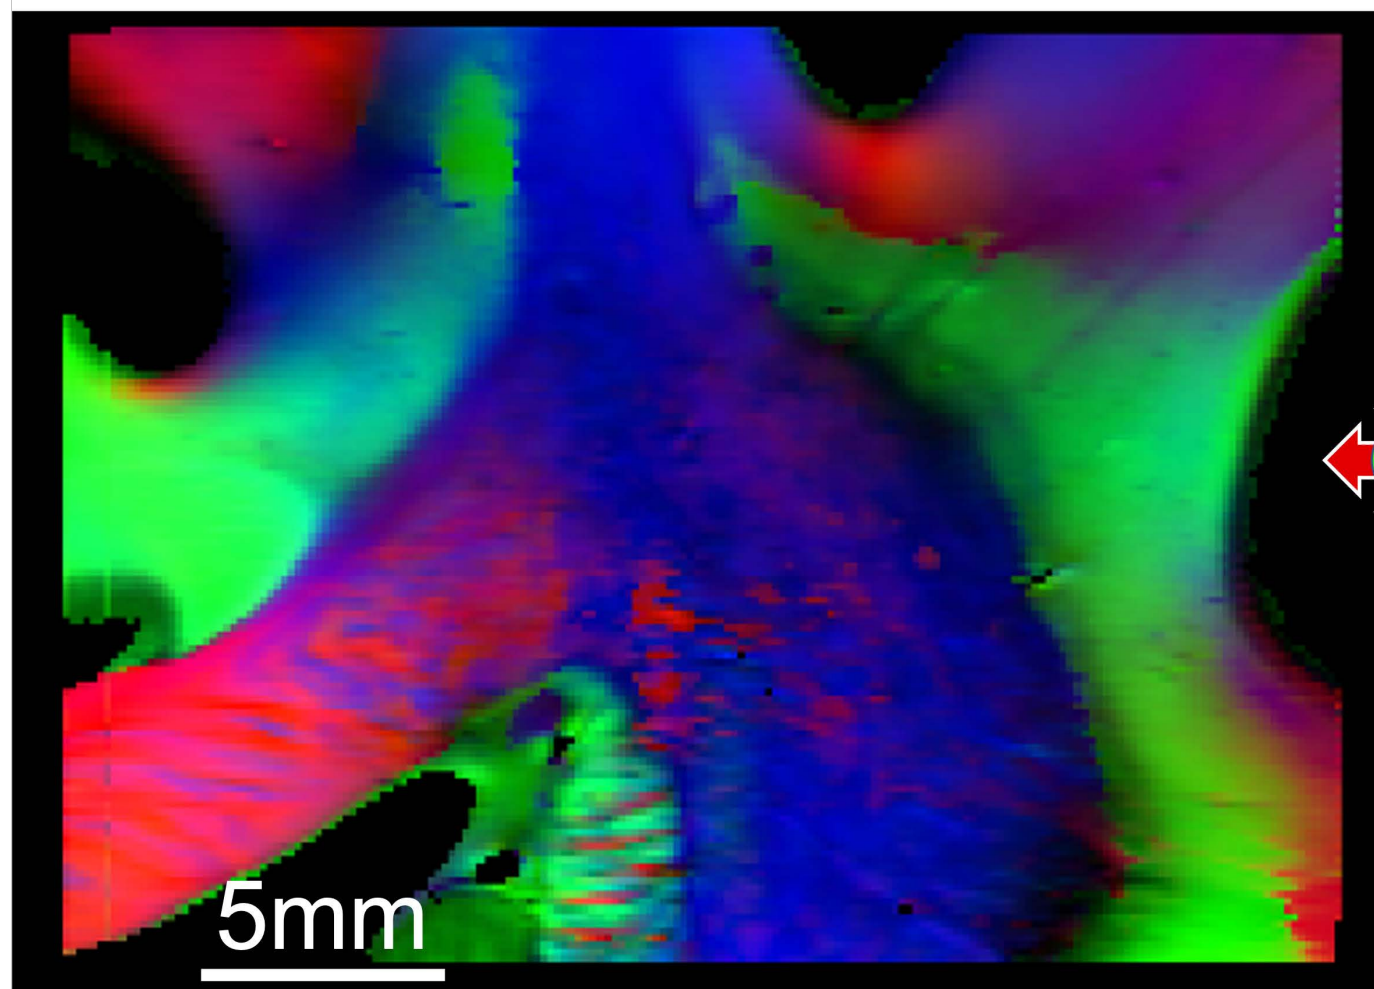

dMRI

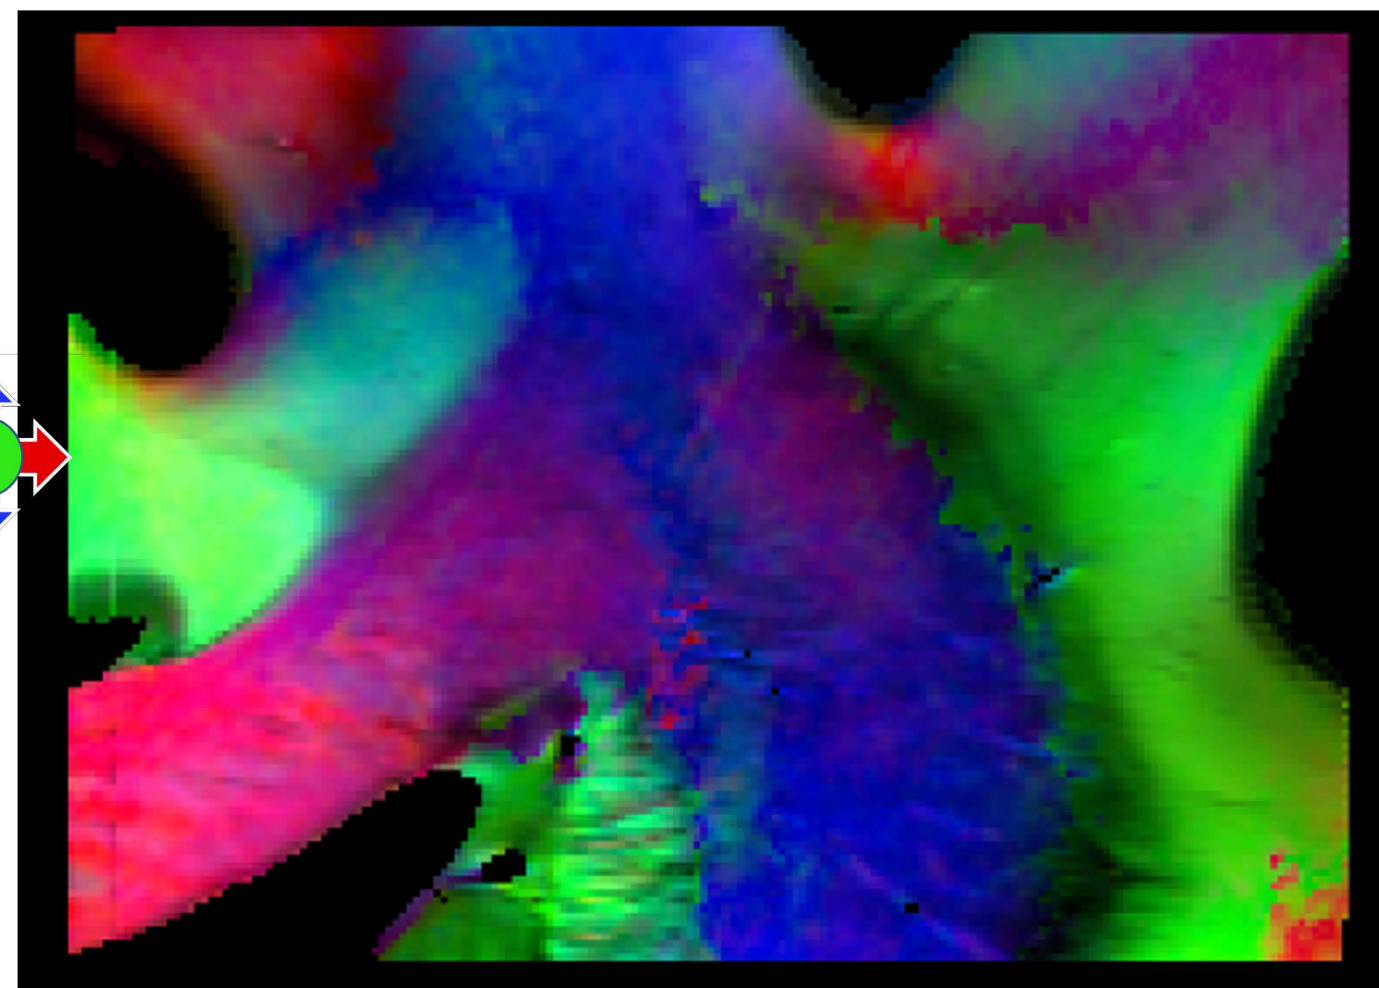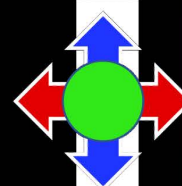

Angular difference

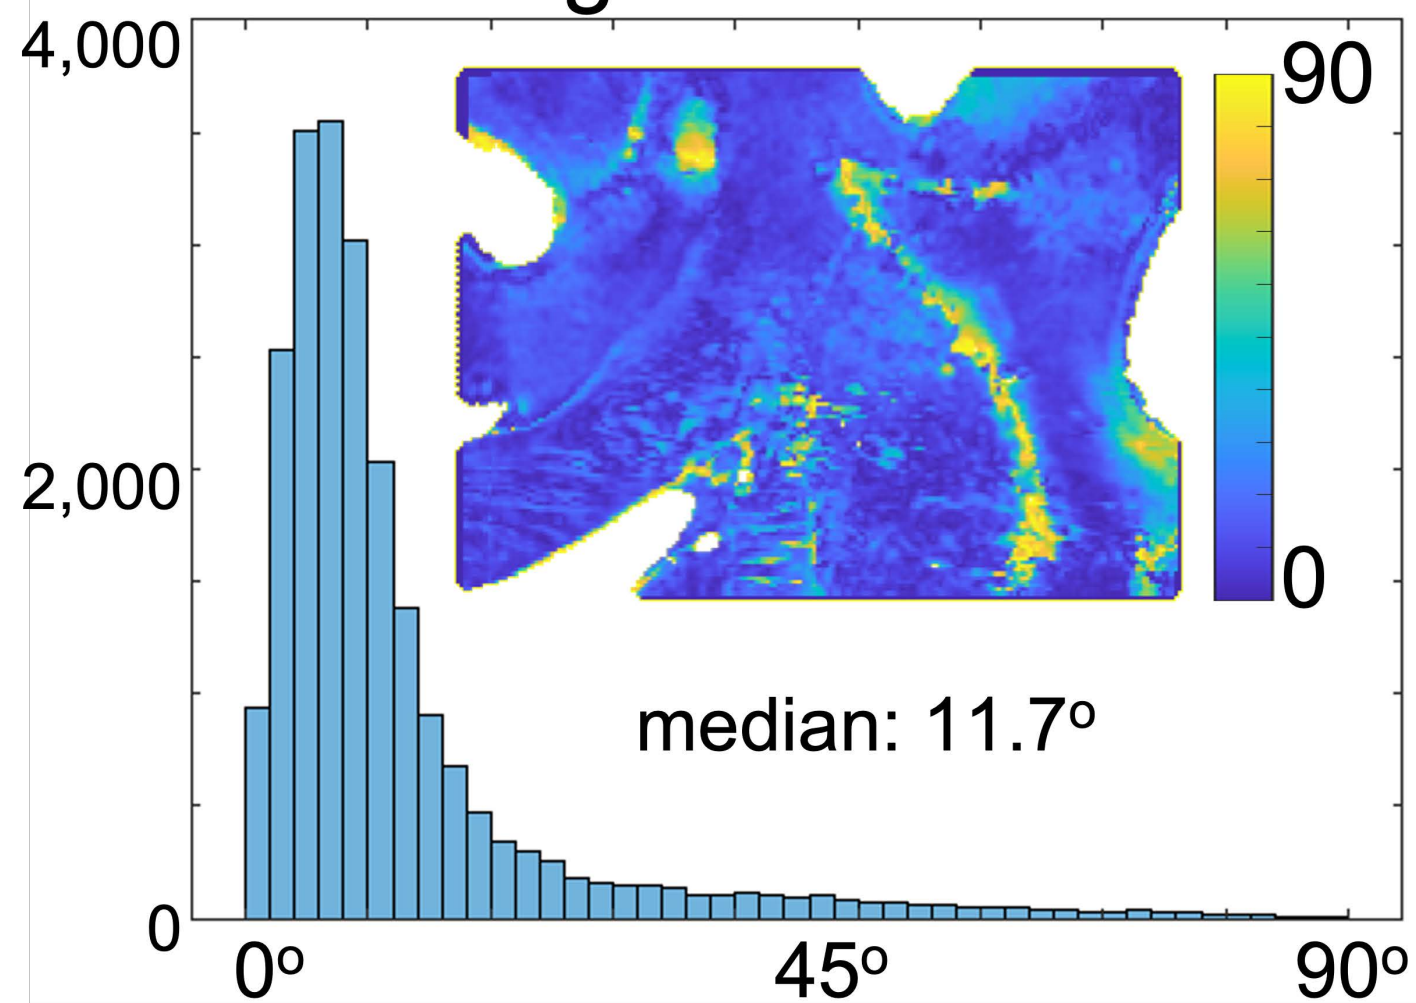

Dot product

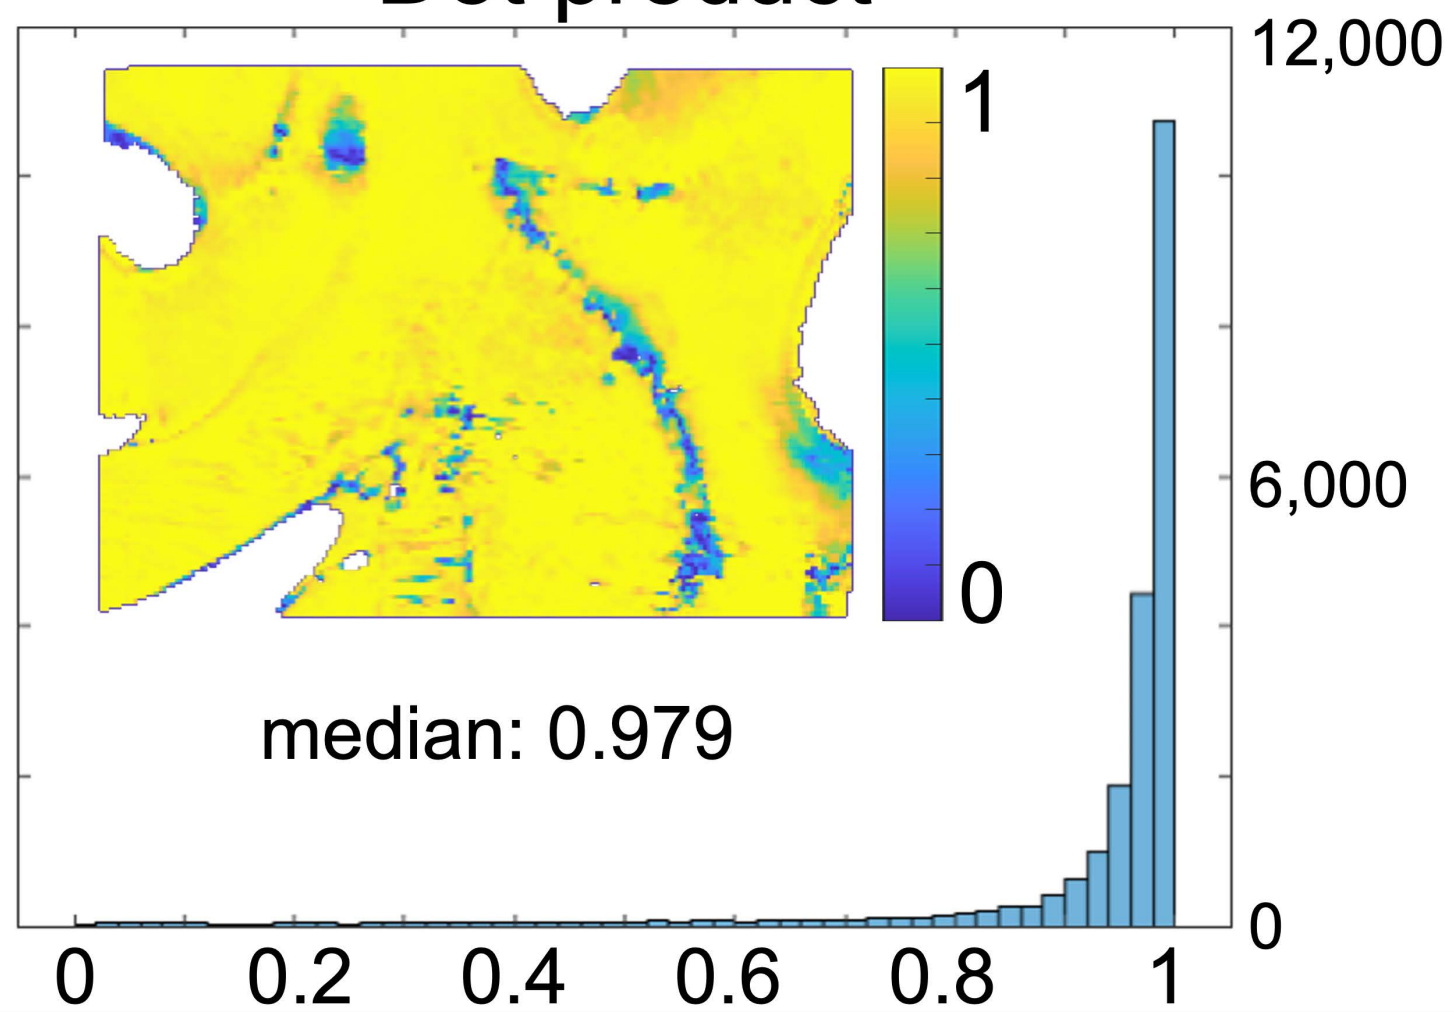

Supplement: supp [file elife-84024-supp-v1.zip]

**A**      vervet

reference

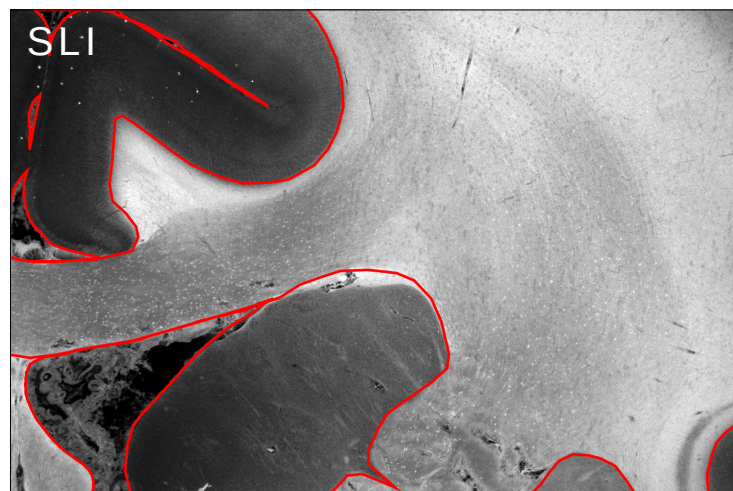

registered

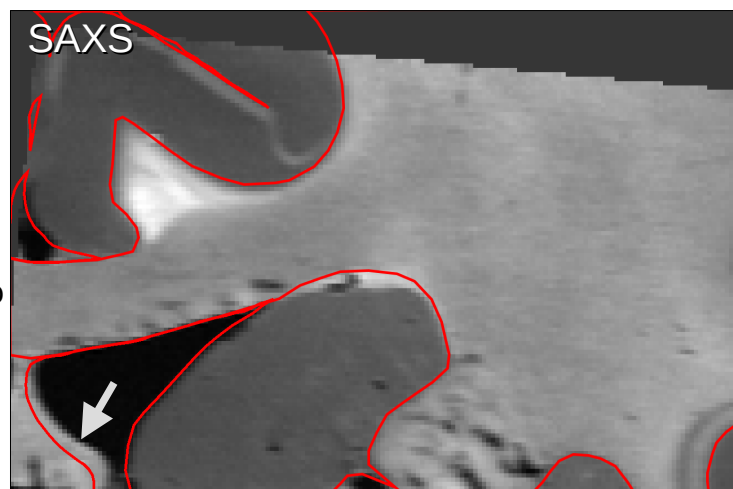

overlaid

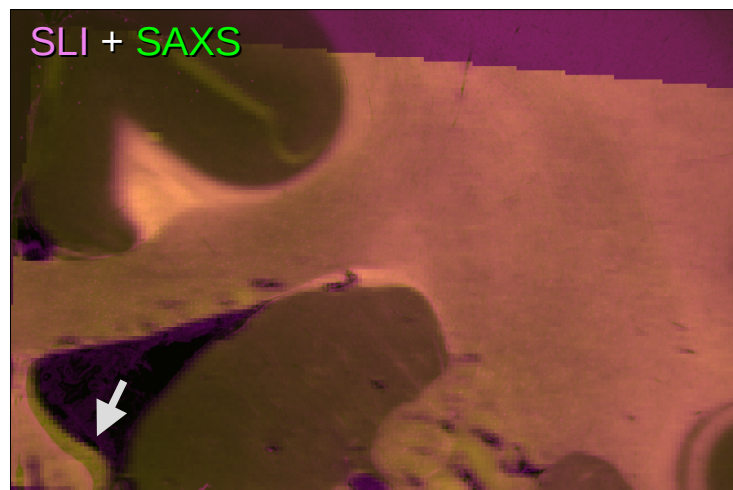**B**      human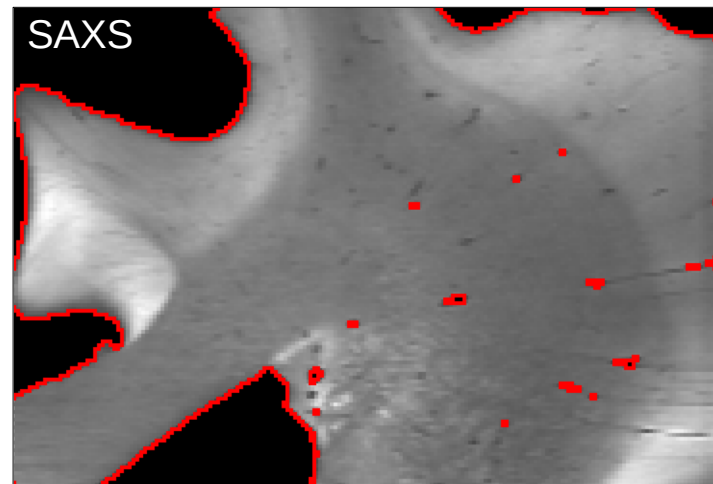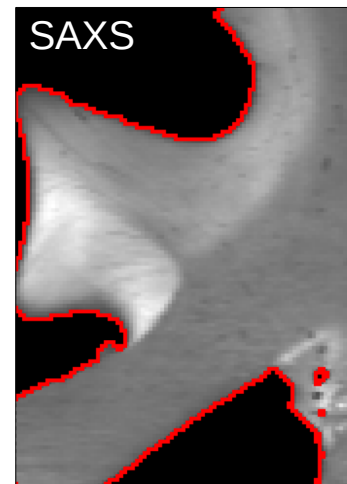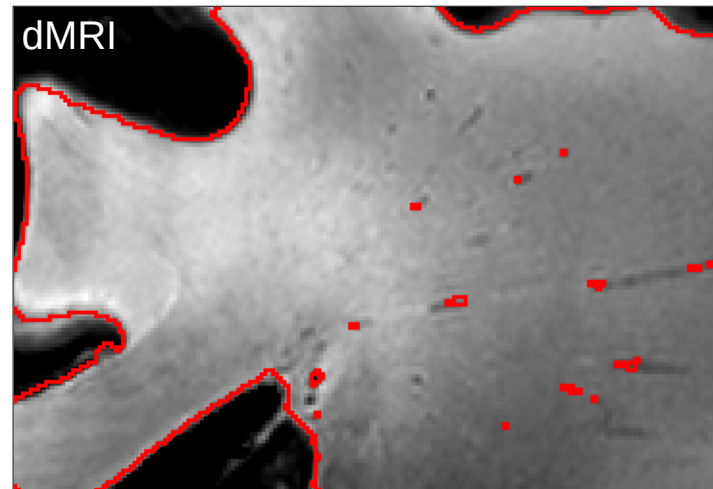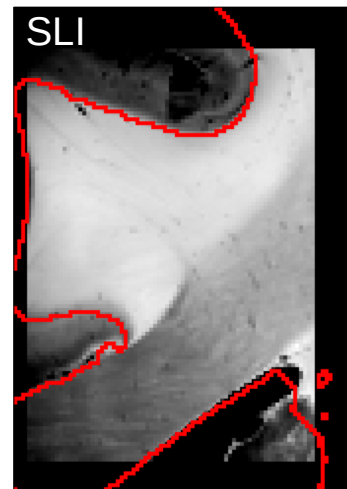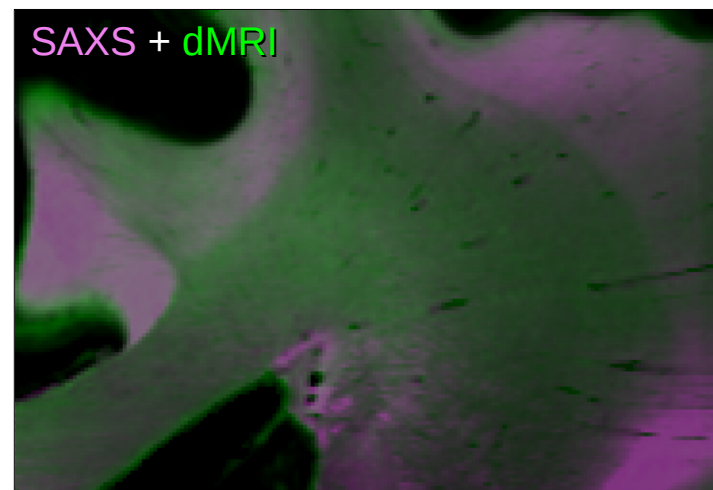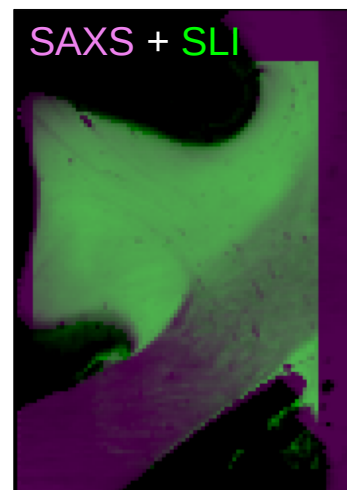

Supplement: supp [file elife-84024-supp-v1.zip]

b0

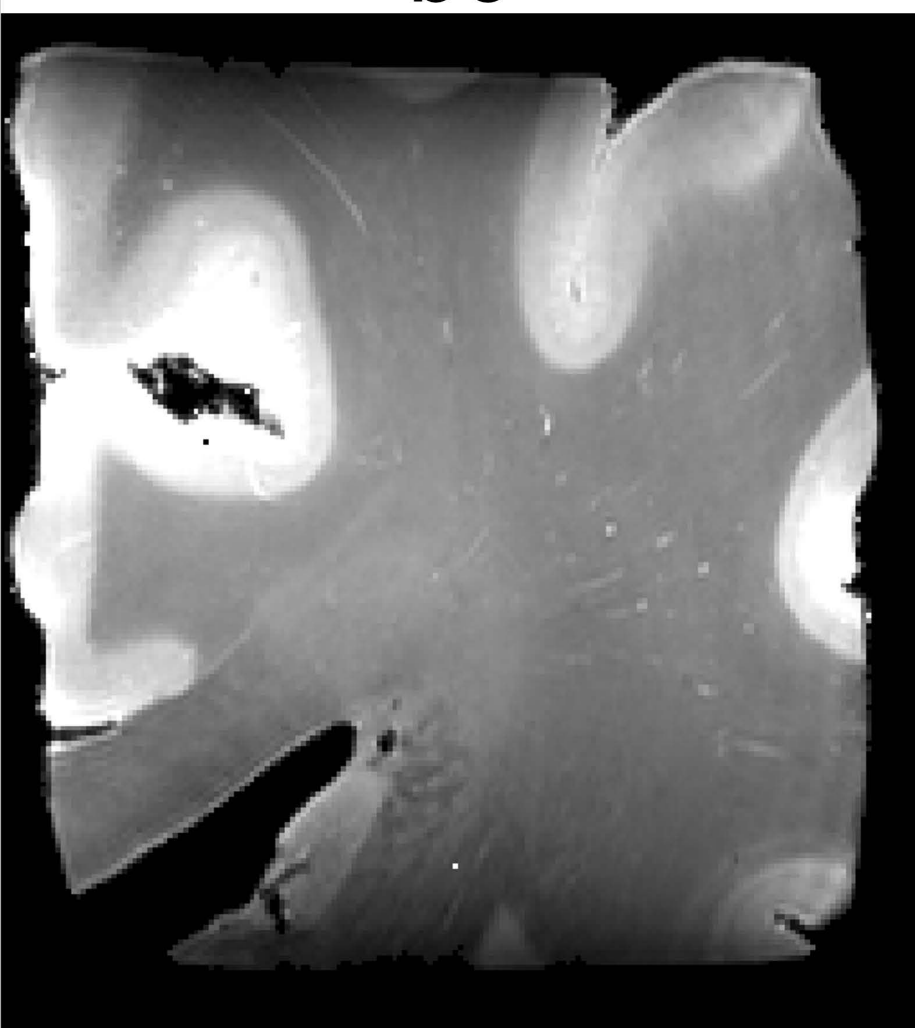

0 1,000

FA

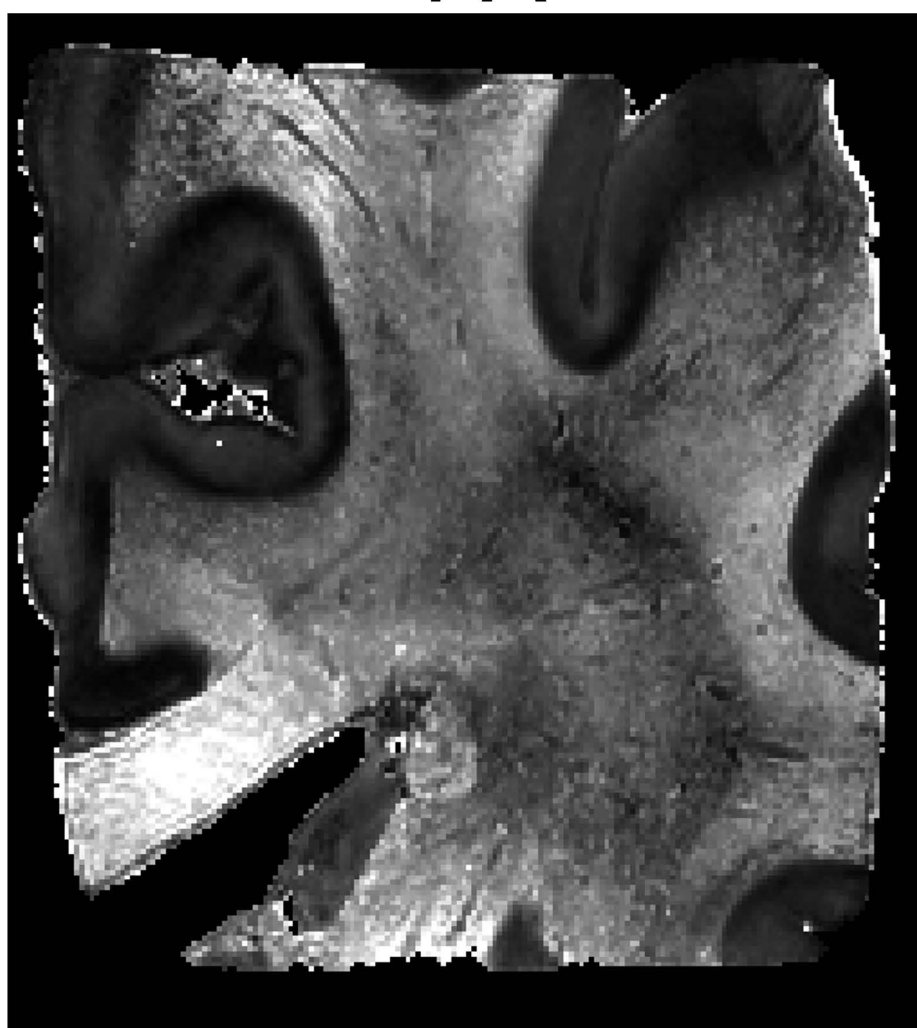

0 0.7

AWF

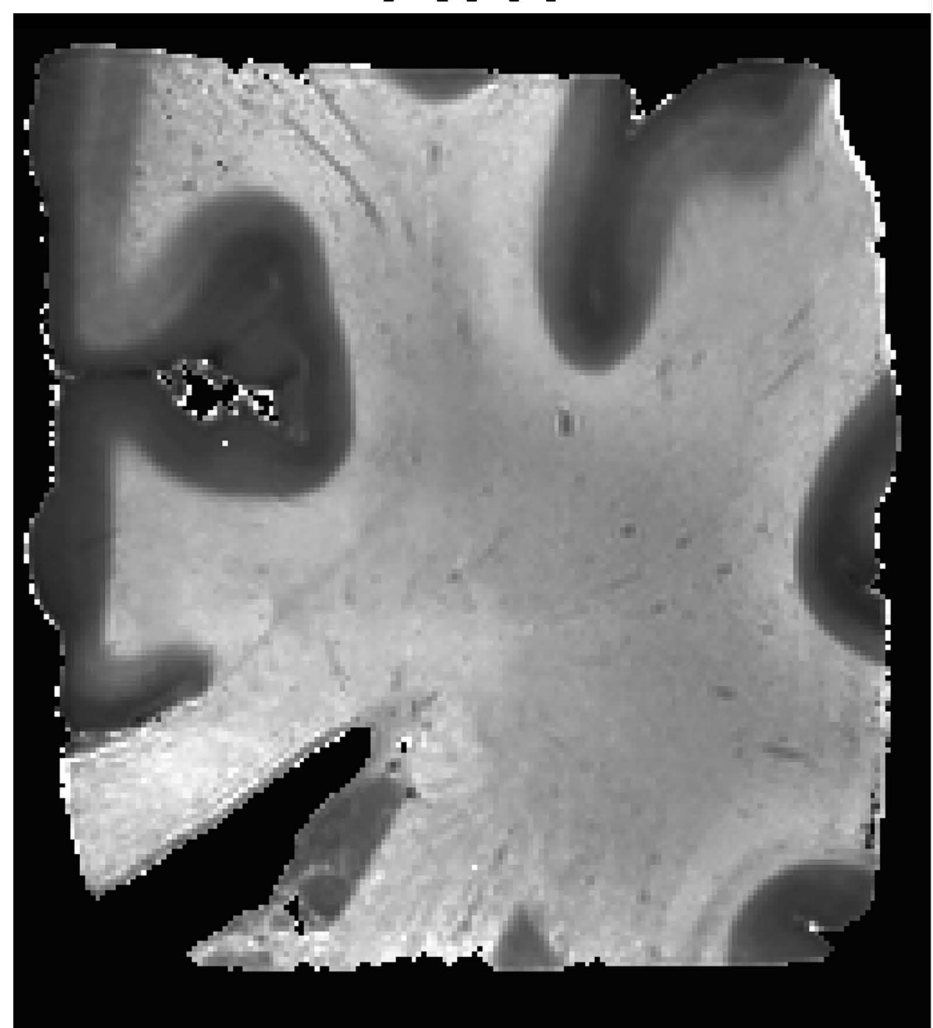

0 1

AD

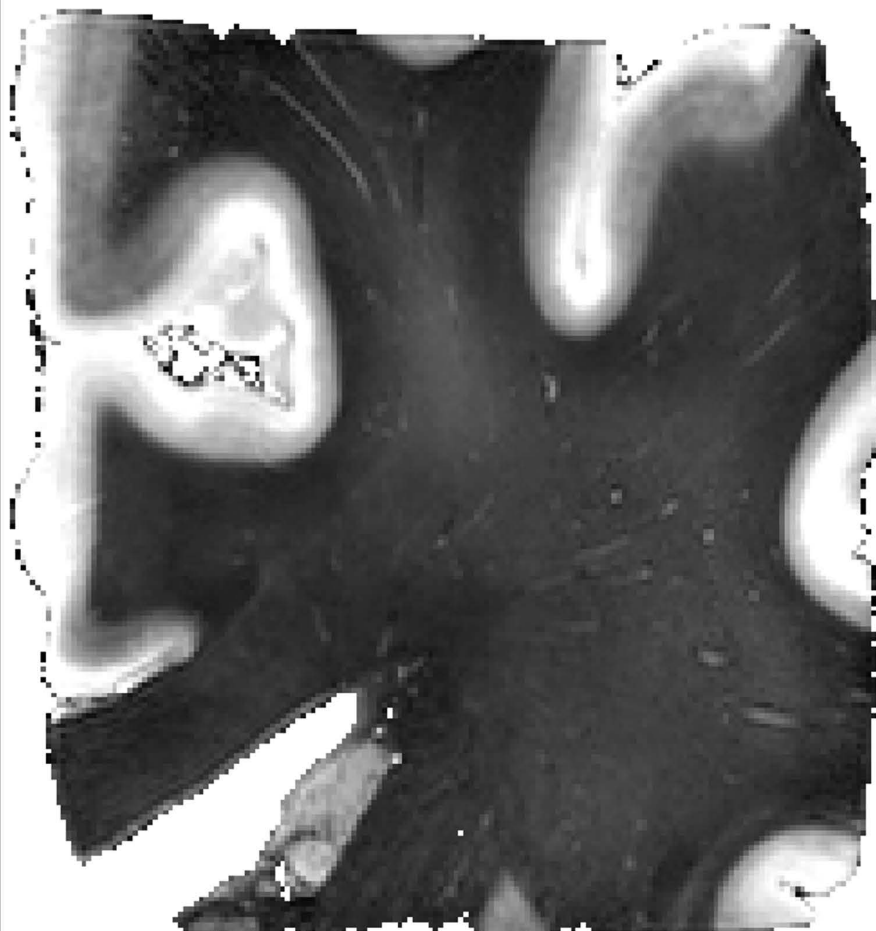

0 0.5

MD

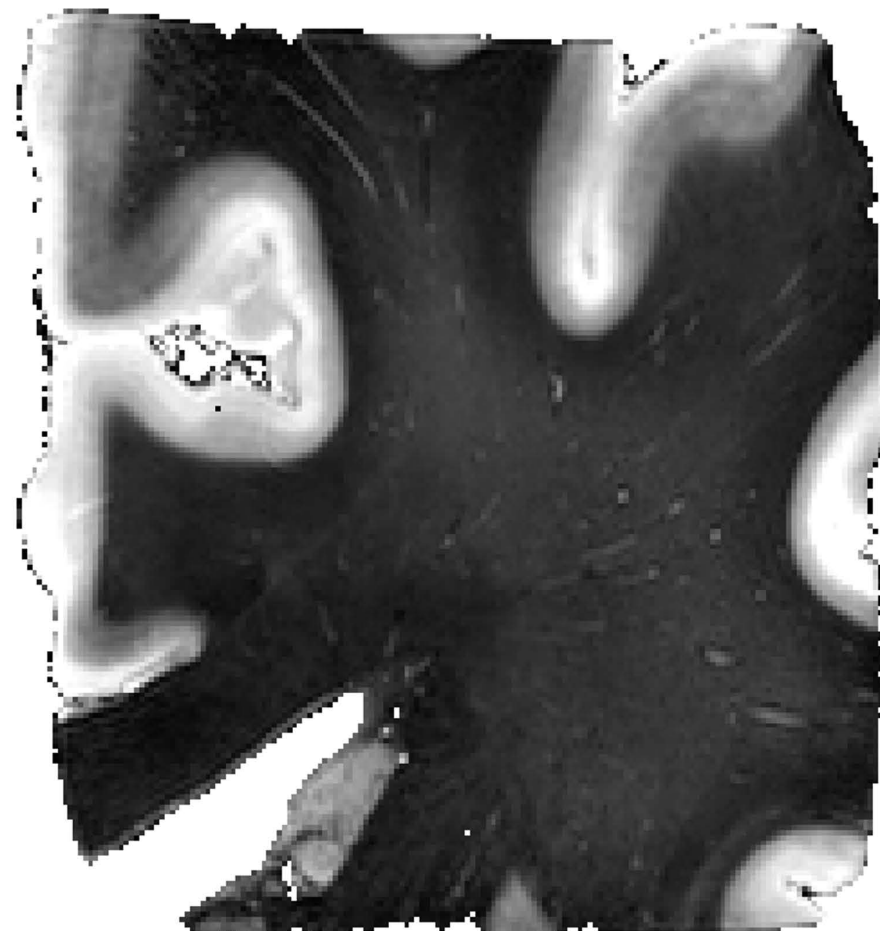

0 0.5

RD

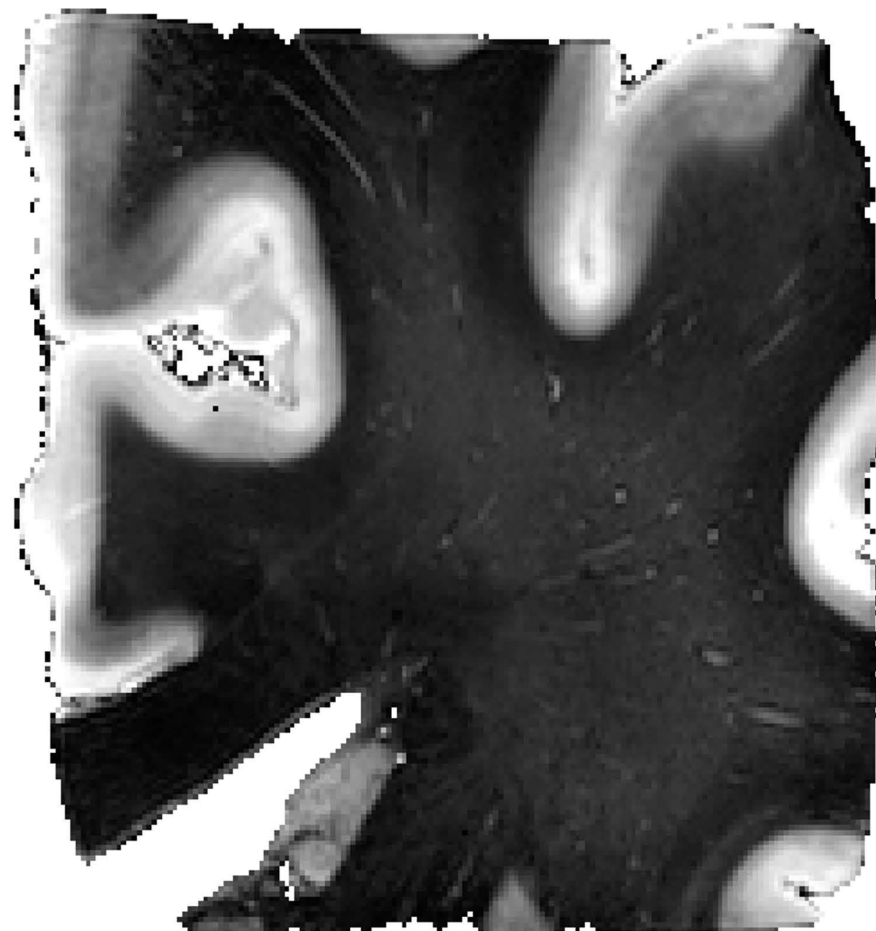

0 0.5

AK

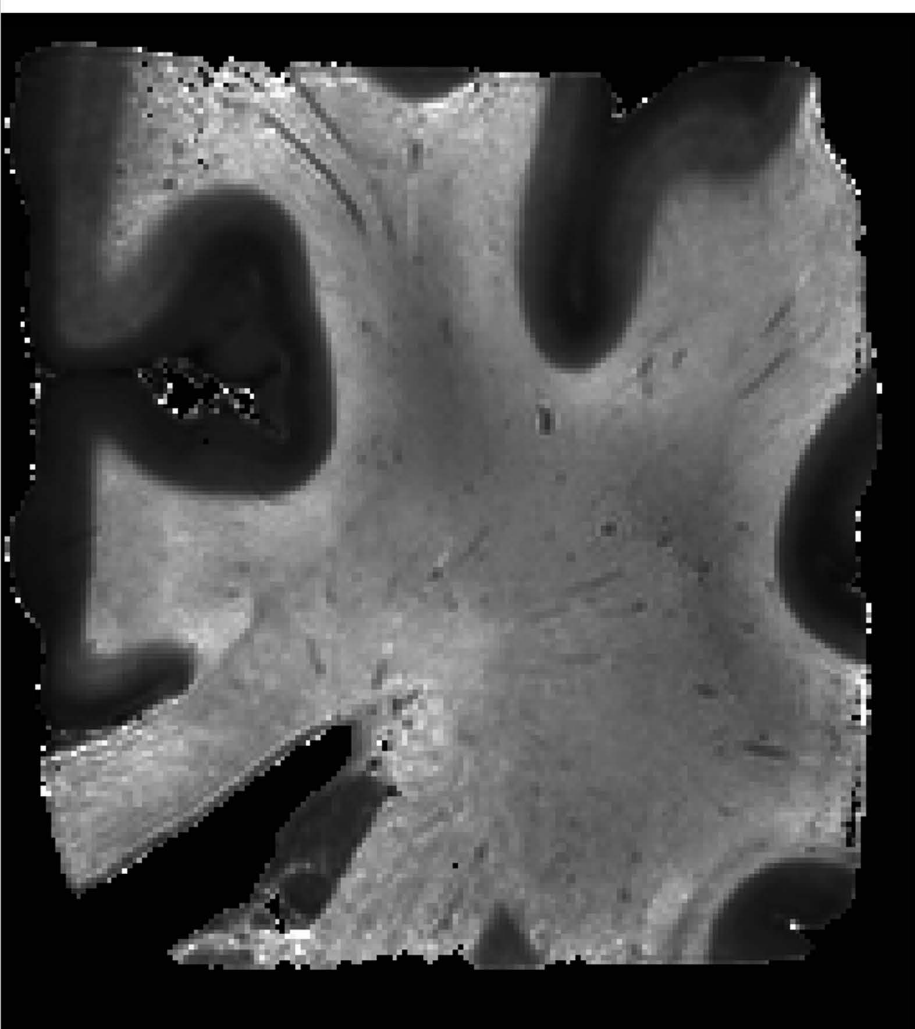

0 7.5

MK

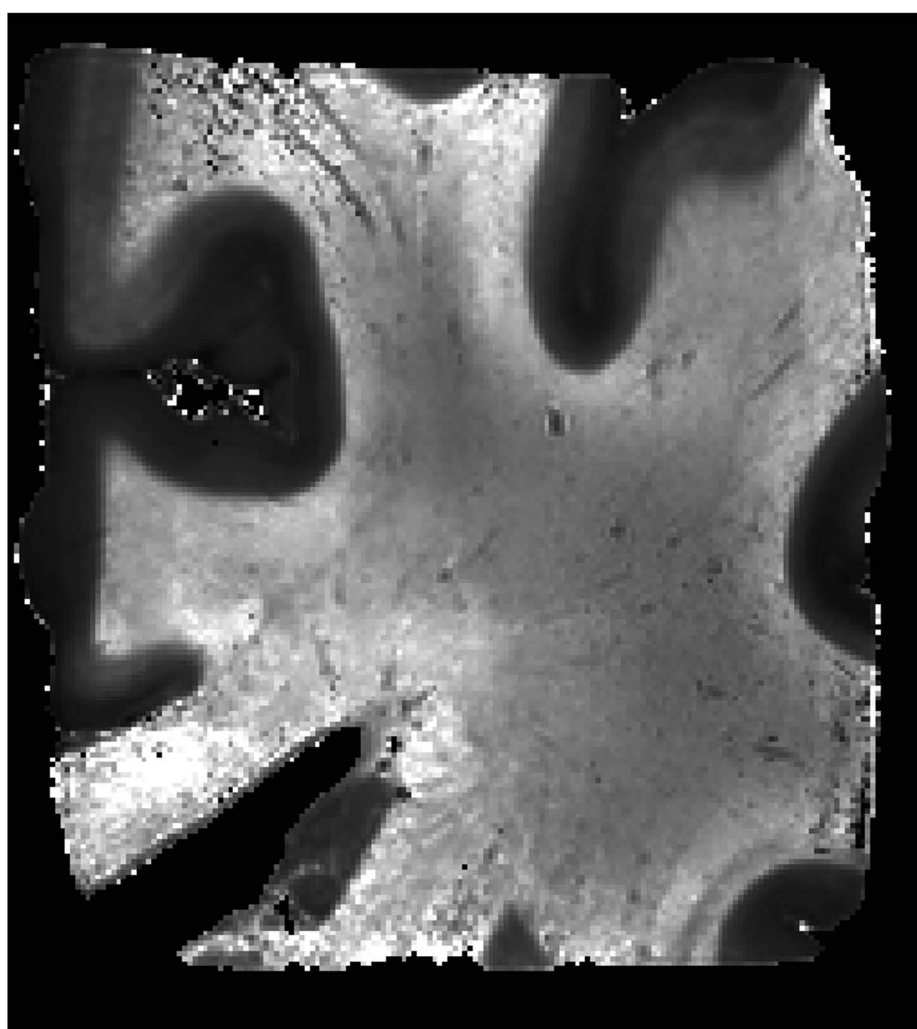

0 7.5

RK

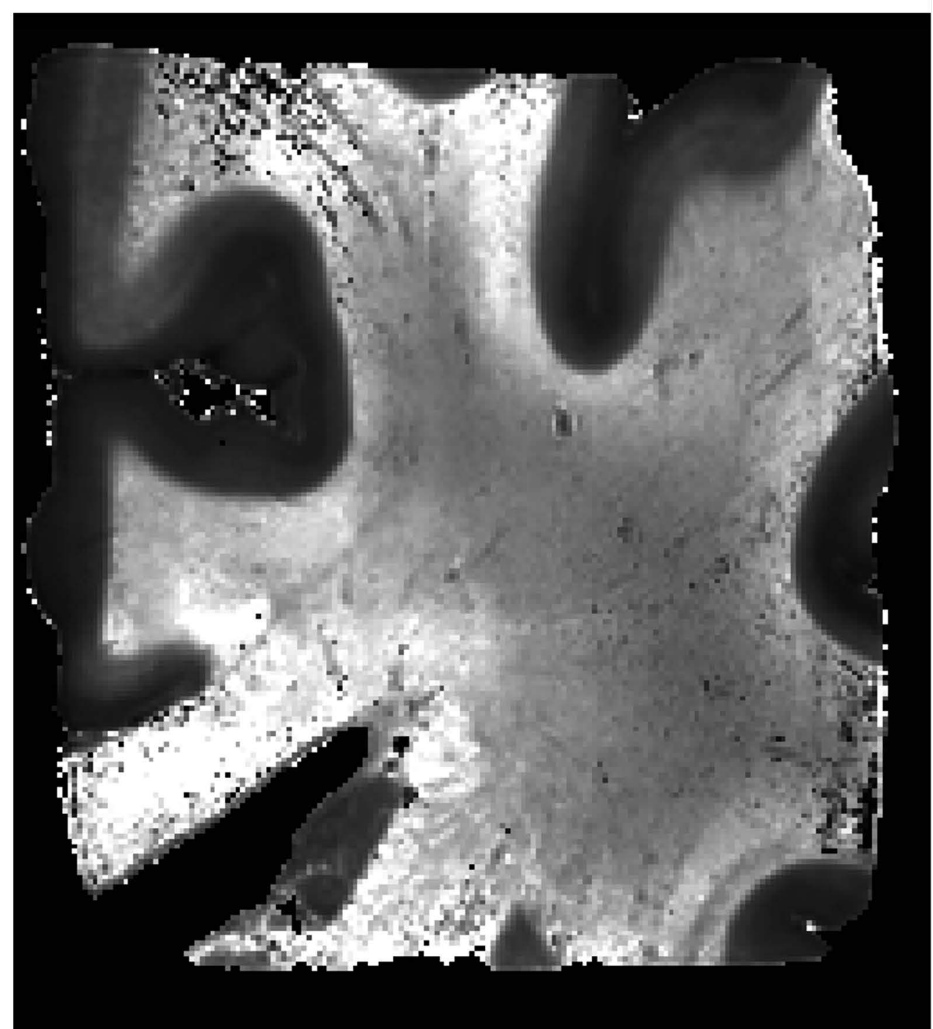

0 7.5

Supplement: supp [file elife-84024-supp-v1.zip]

SAXS

Average

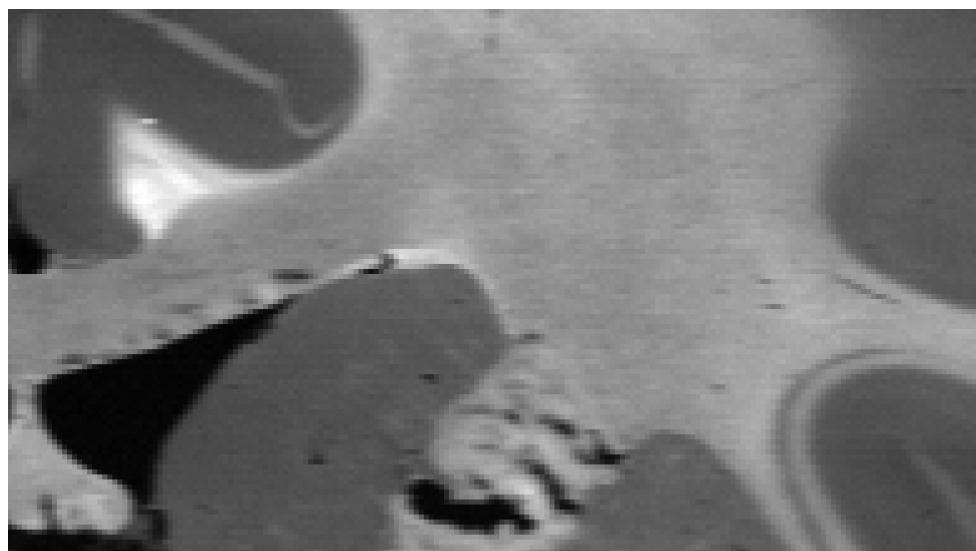

4.06

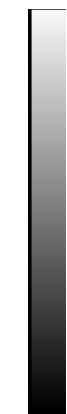

1.45

Minimum

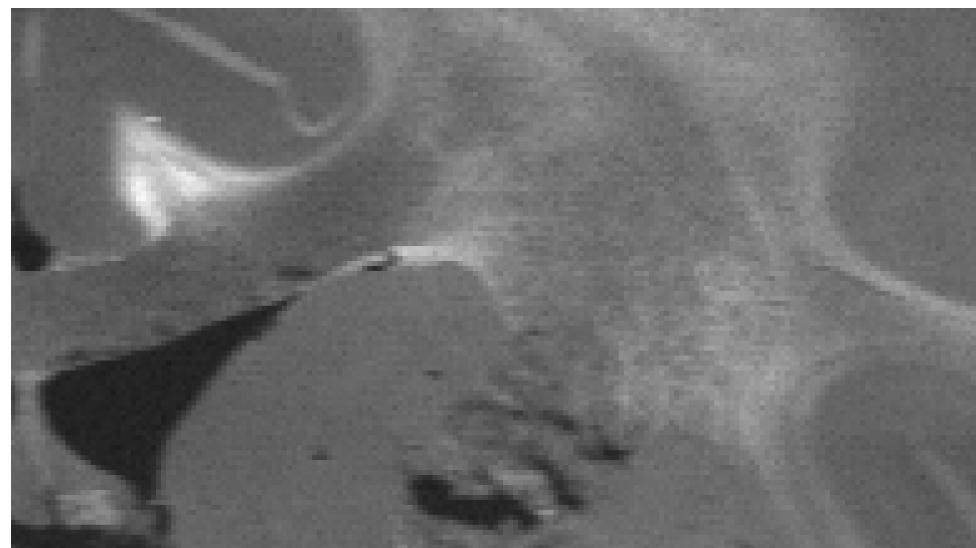

4

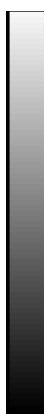

1

Maximum

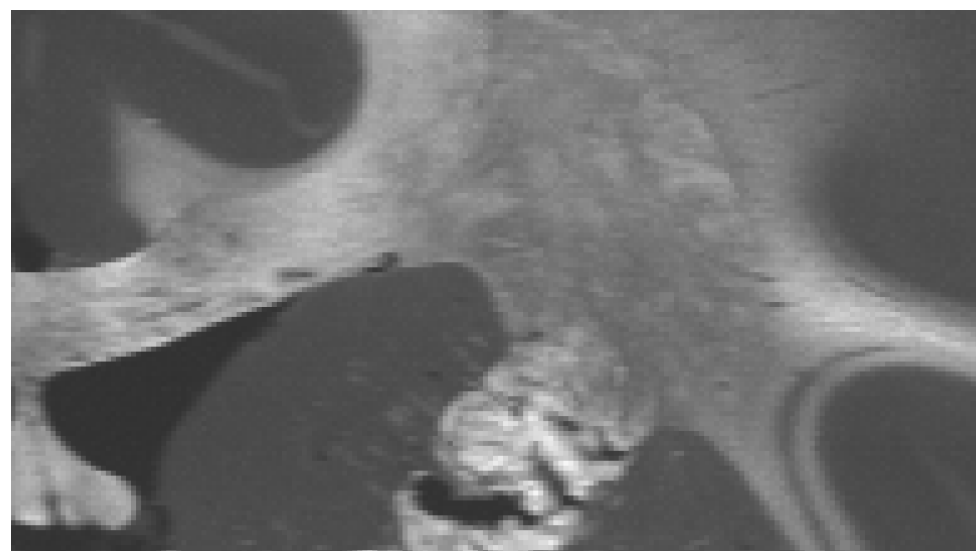

8

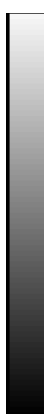

0

Peak prominence

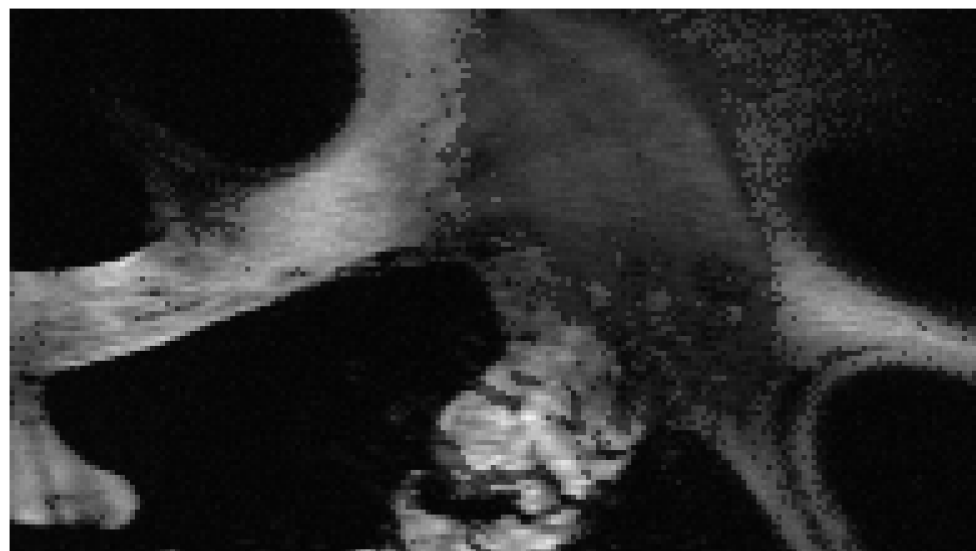

2

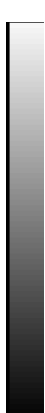

0

Peak width

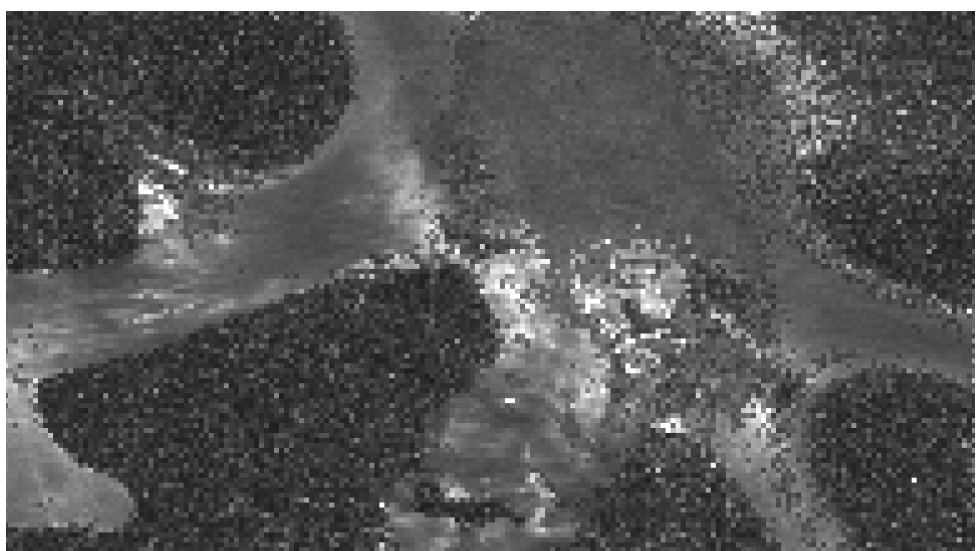

100

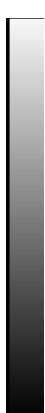

0

SLI

1mm

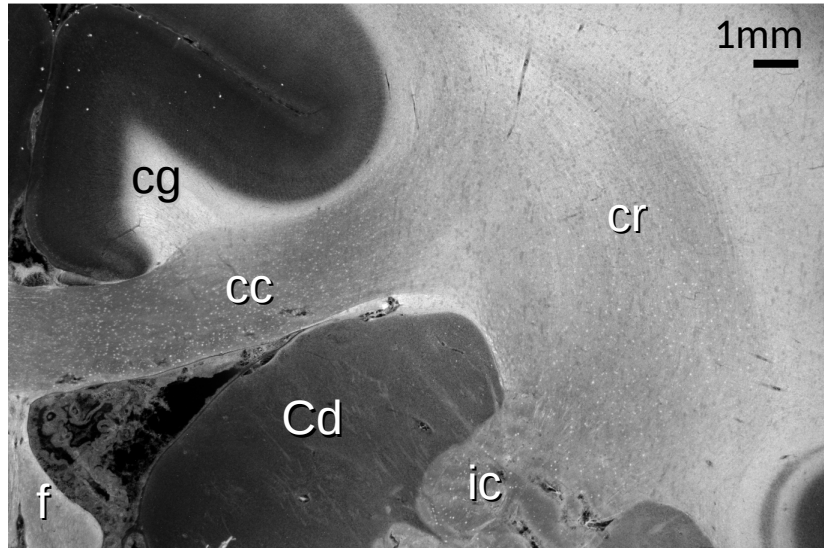

2561

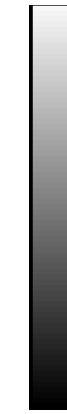

0

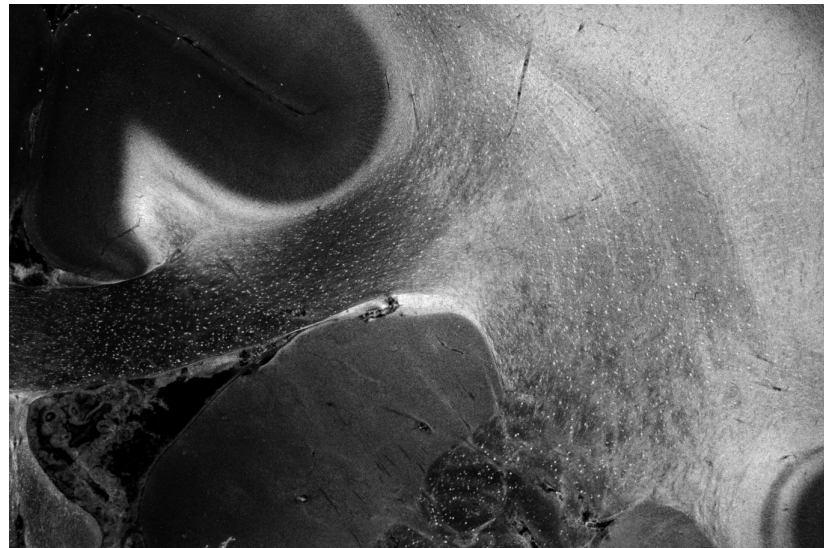

2000

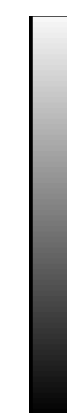

0

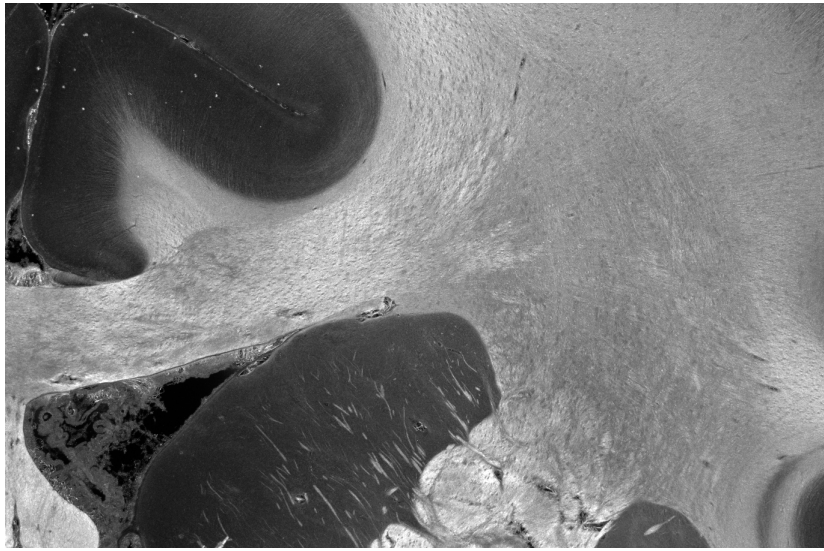

4500

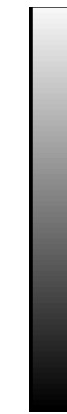

0

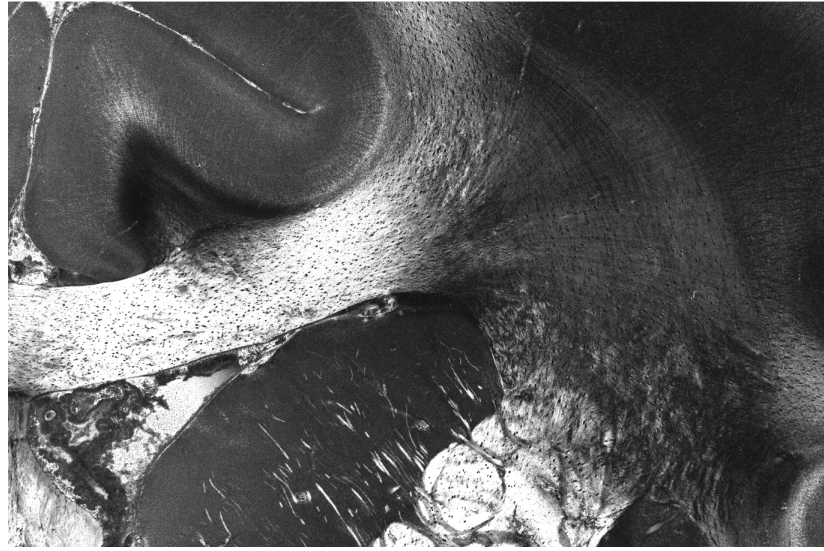

2

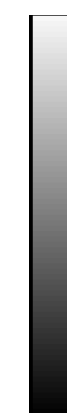

0

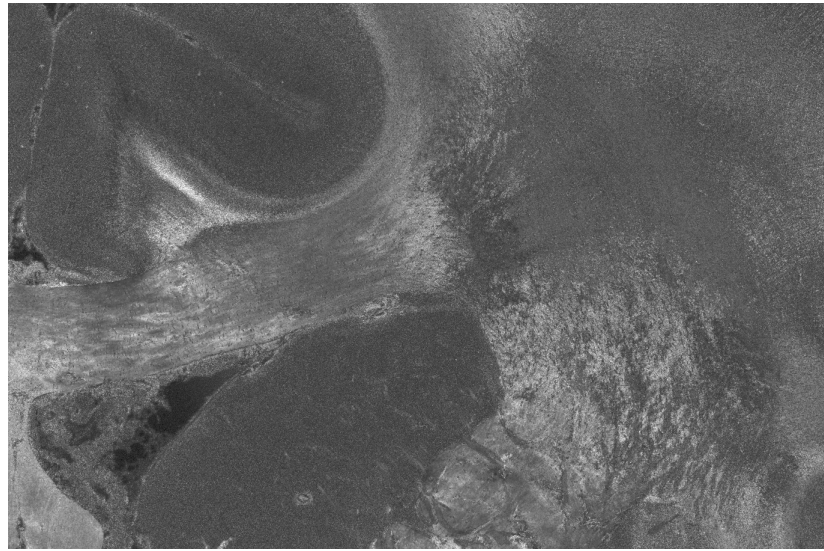

100

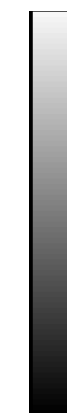

0

Supplement: supp [file elife-84024-supp-v1.zip]

**A**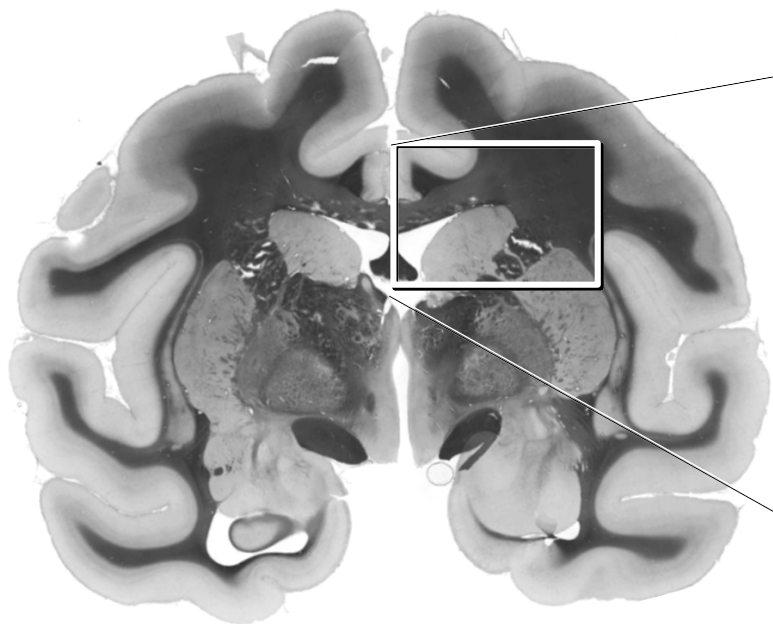**B**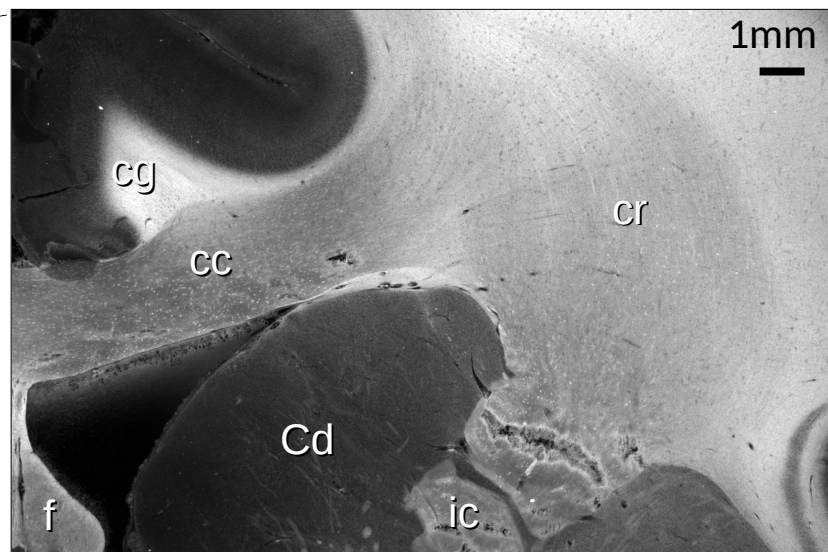**C**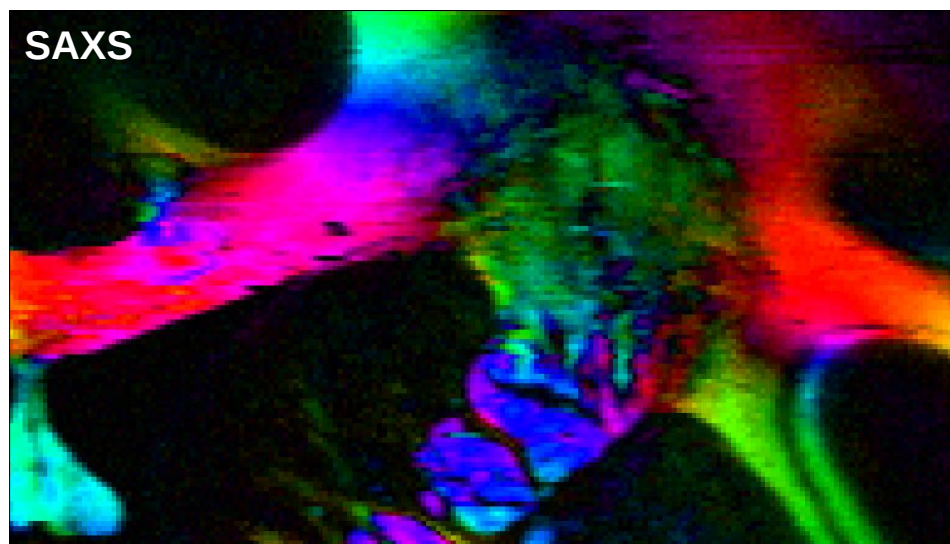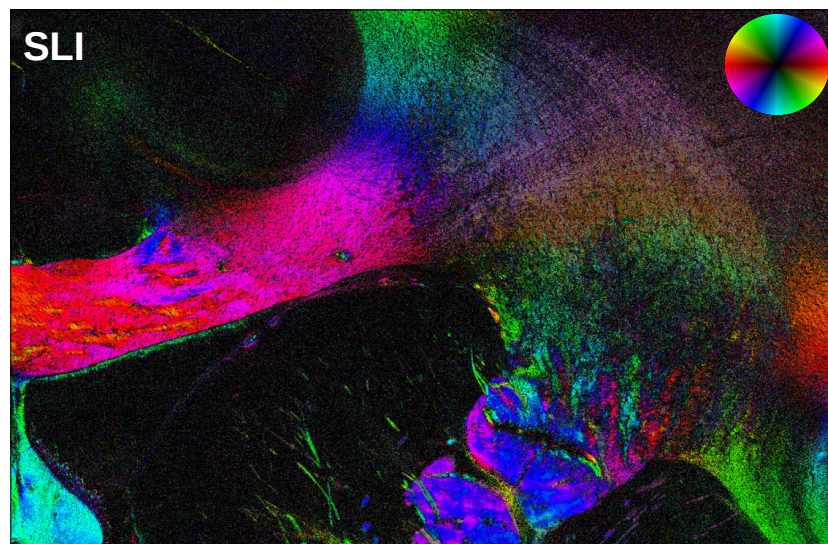**D**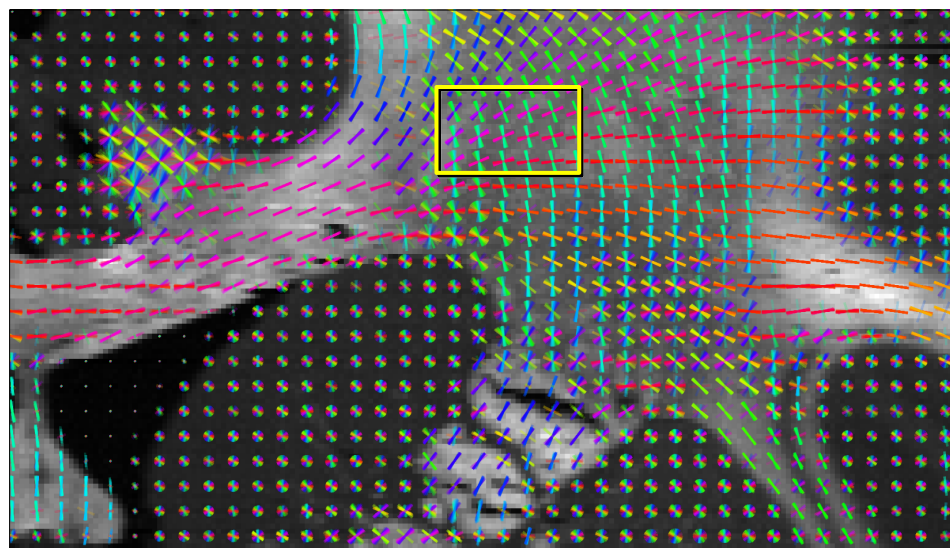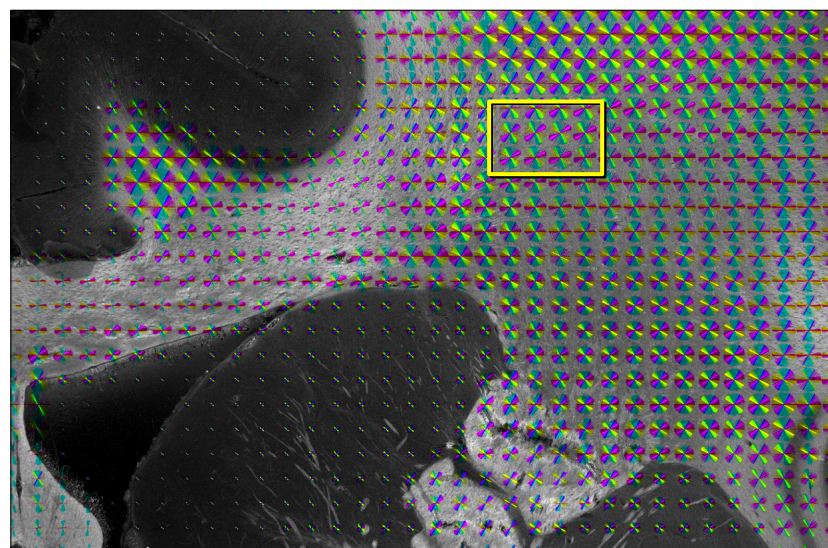**E**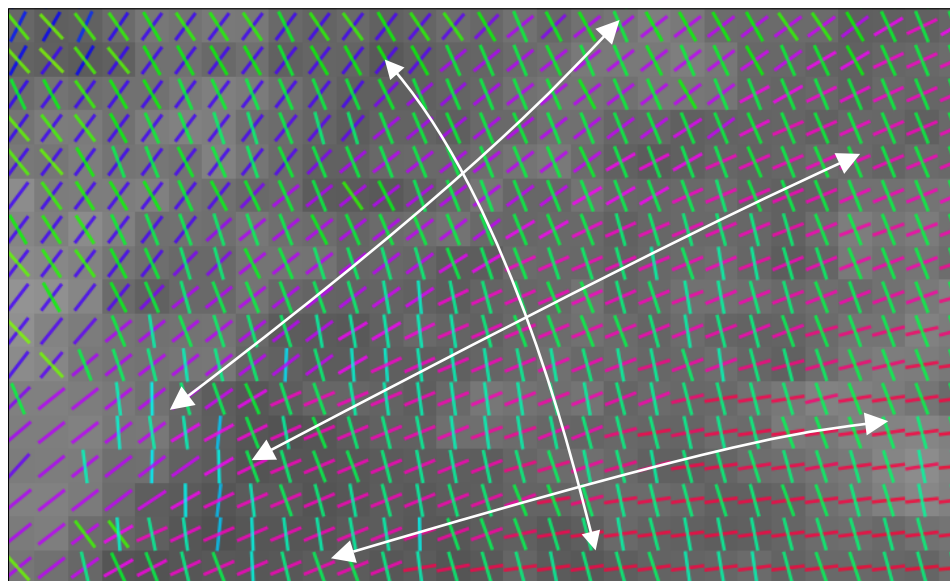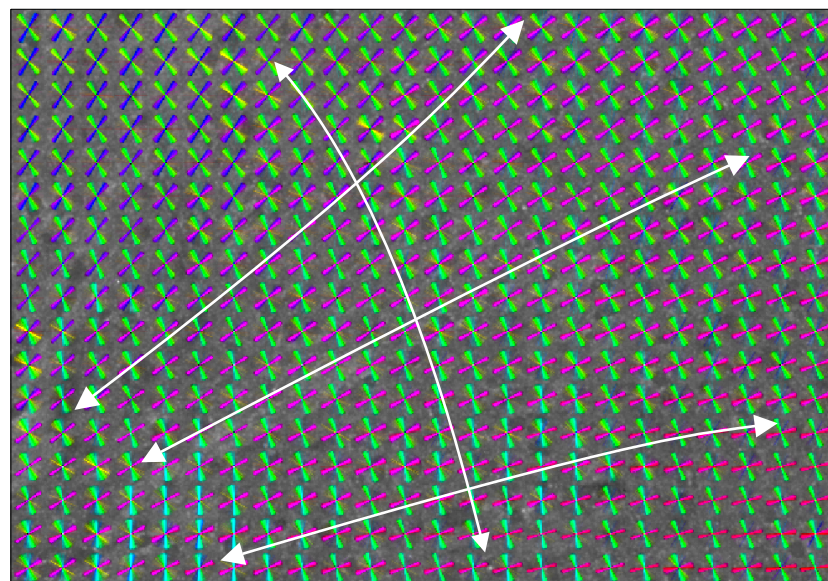

Supplement: supp [file elife-84024-supp-v1.zip]

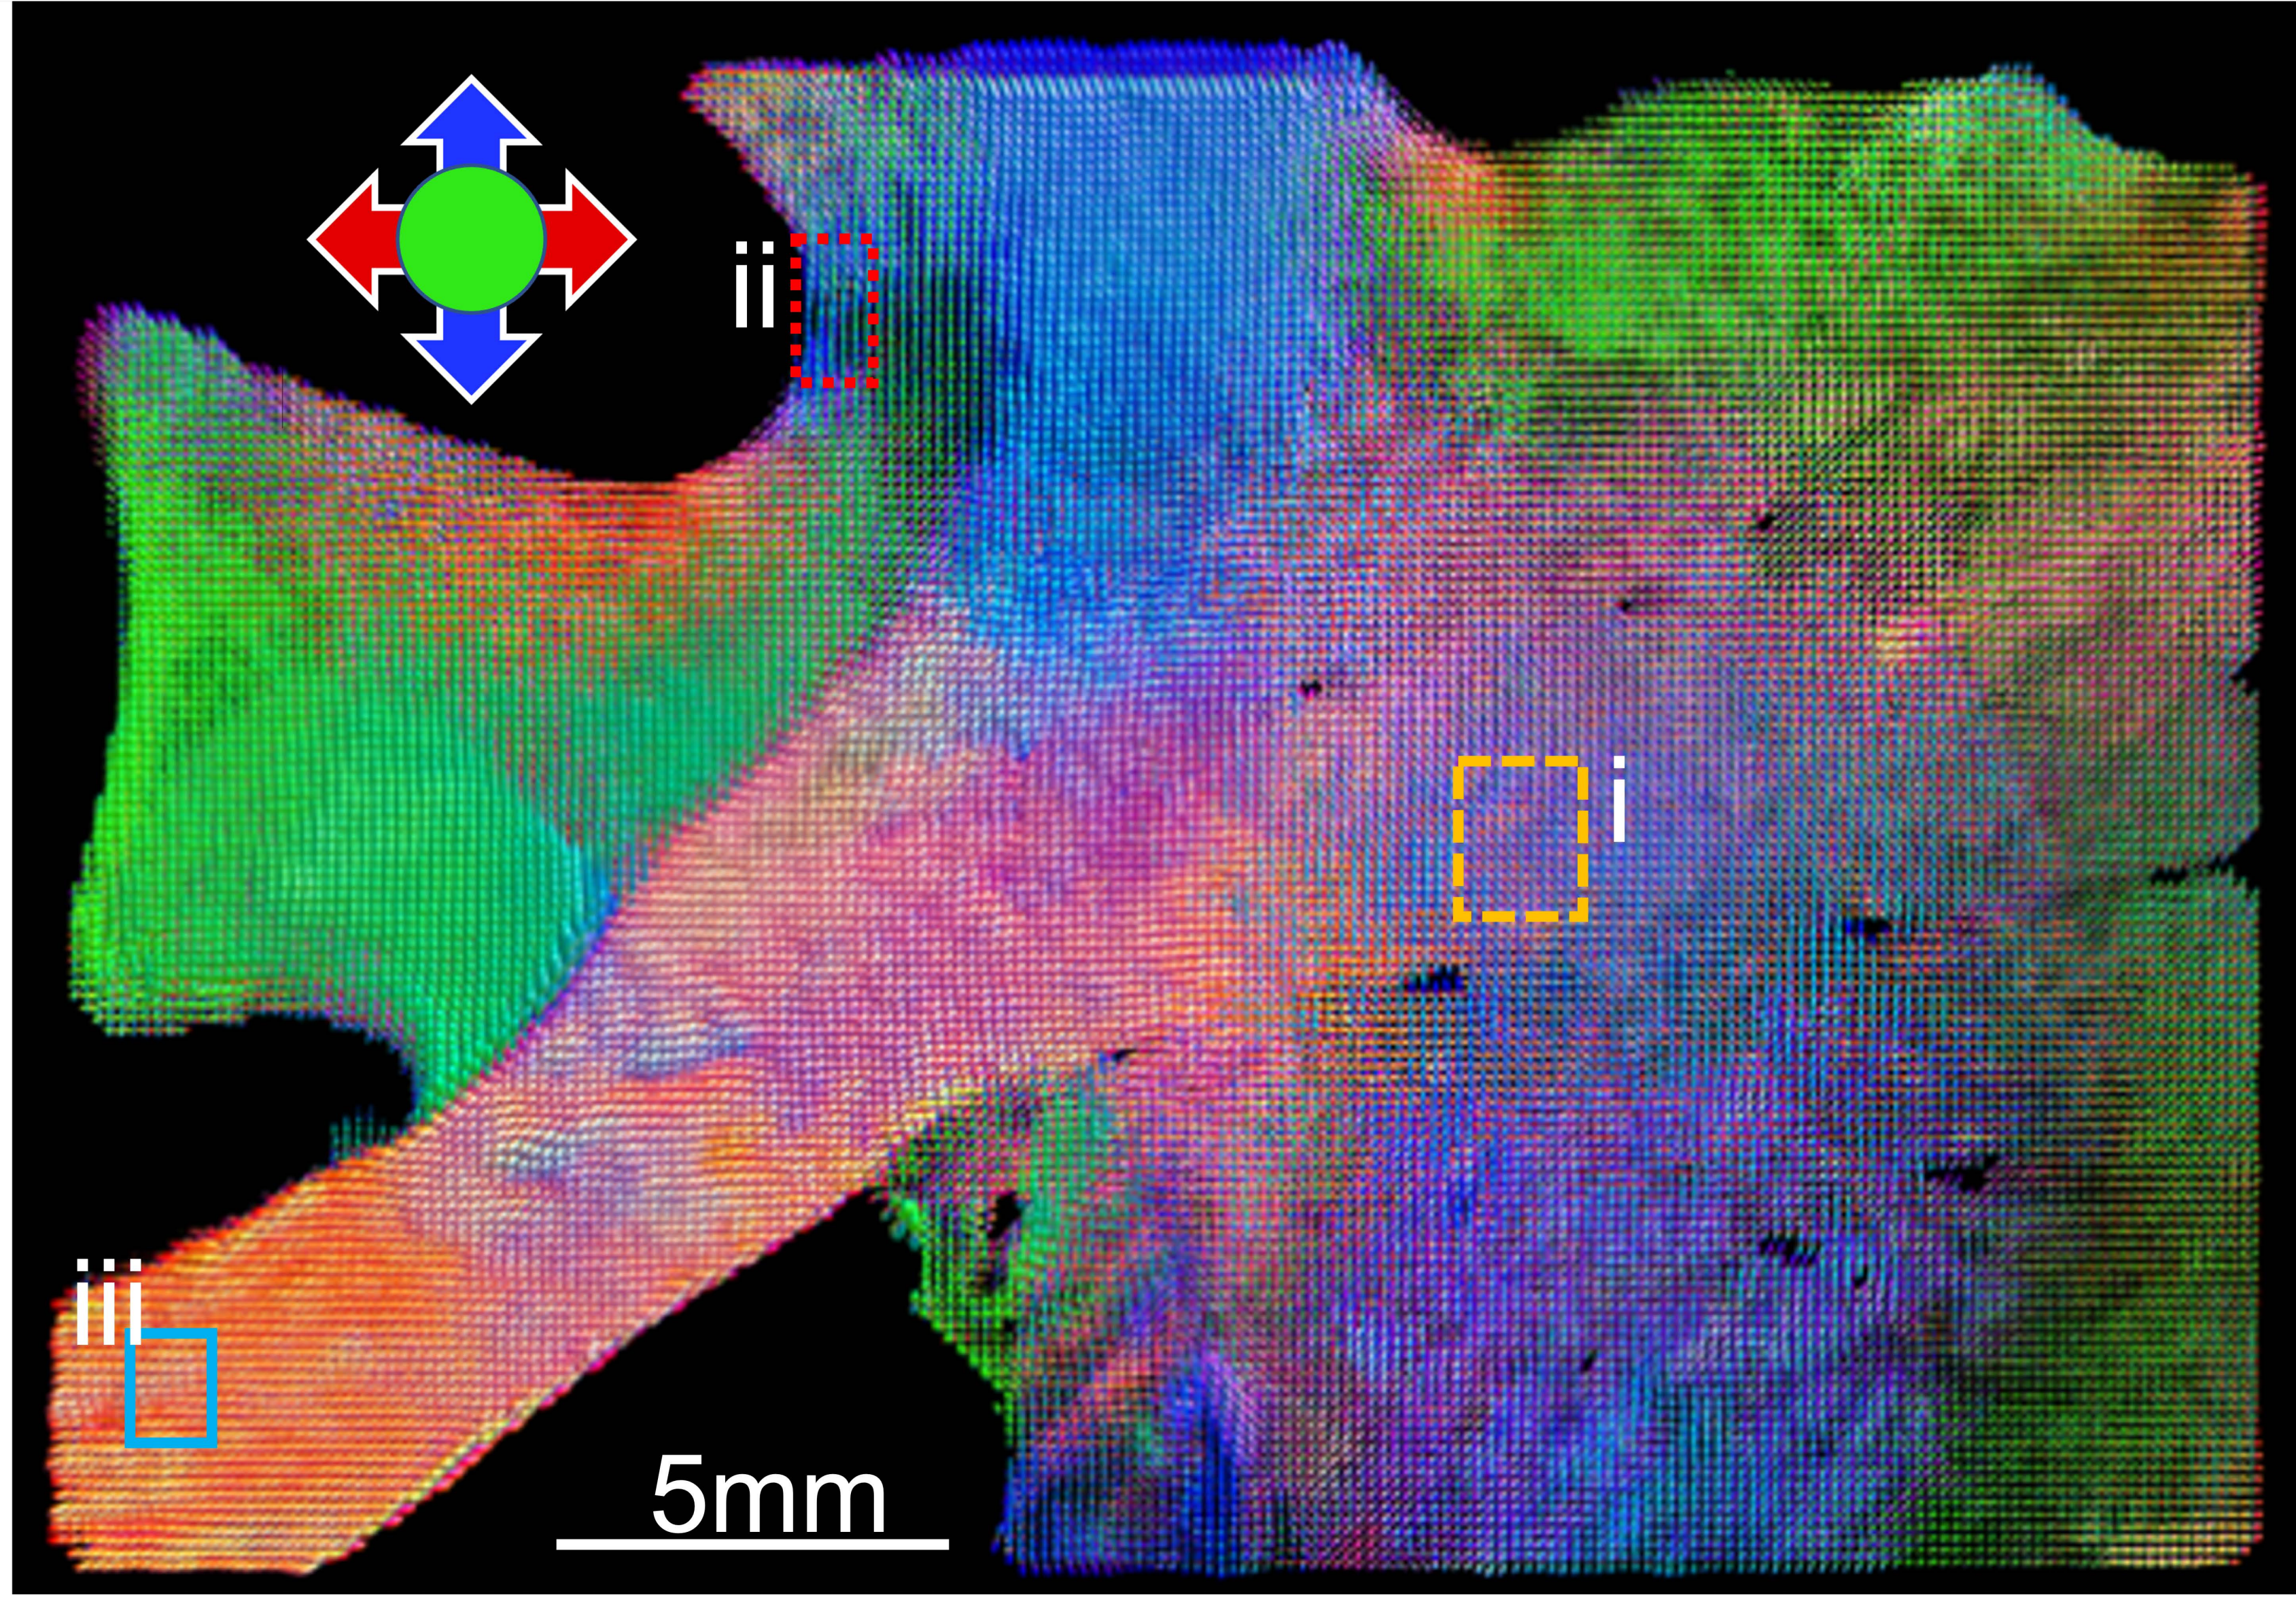

High b-values only

All b-values

i

ii

iii

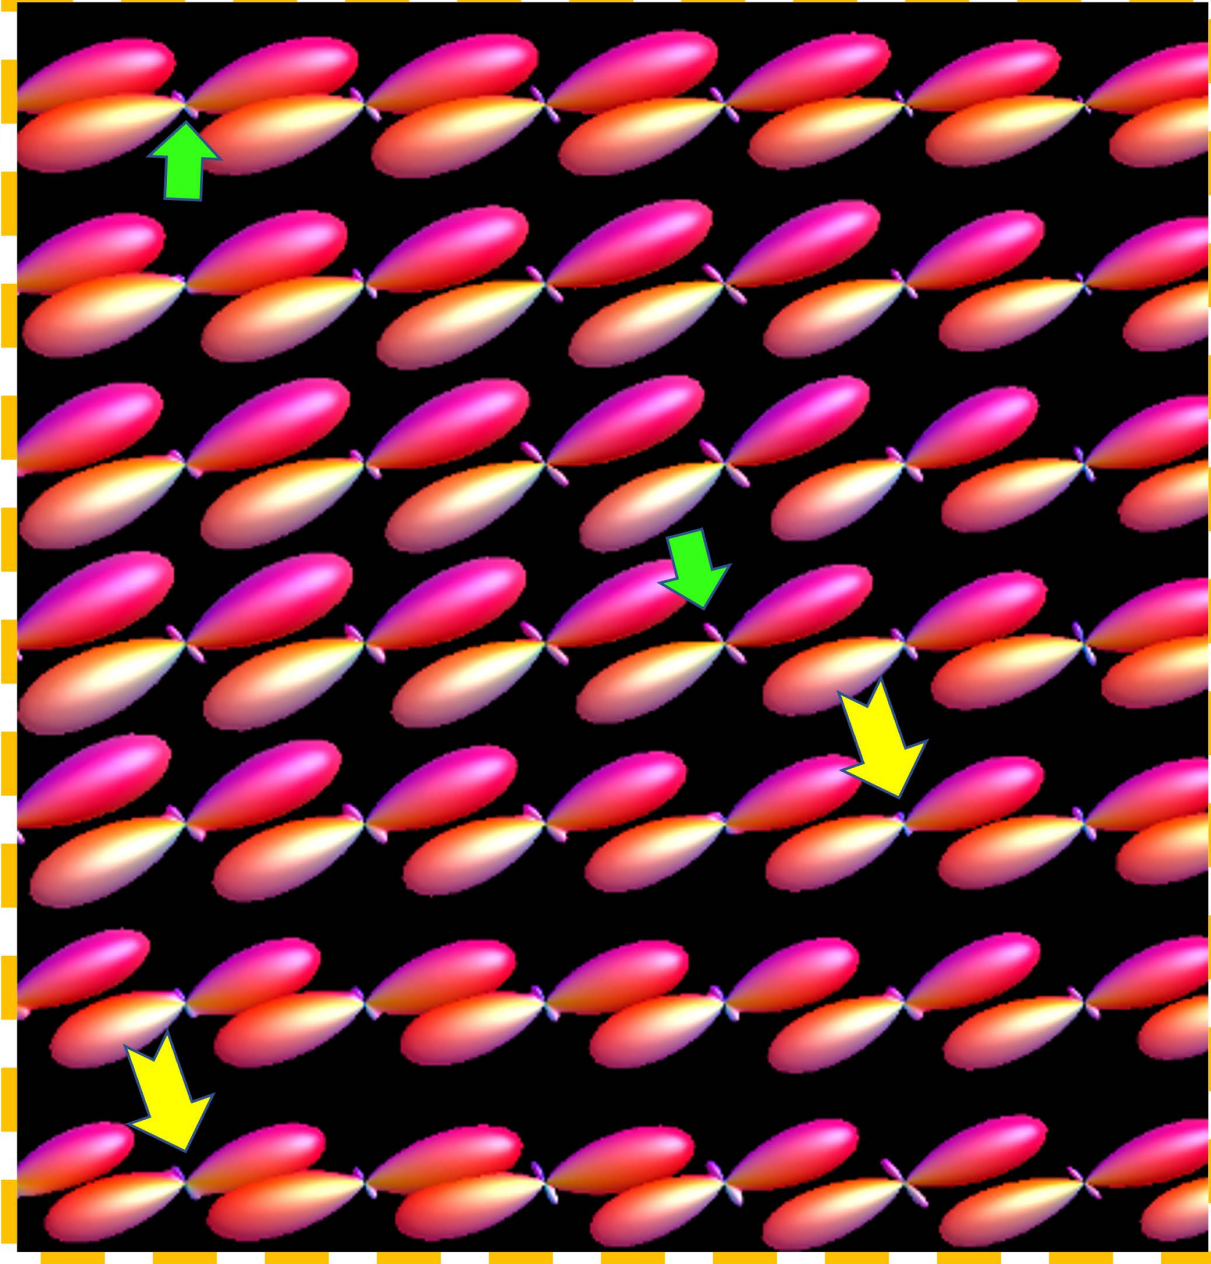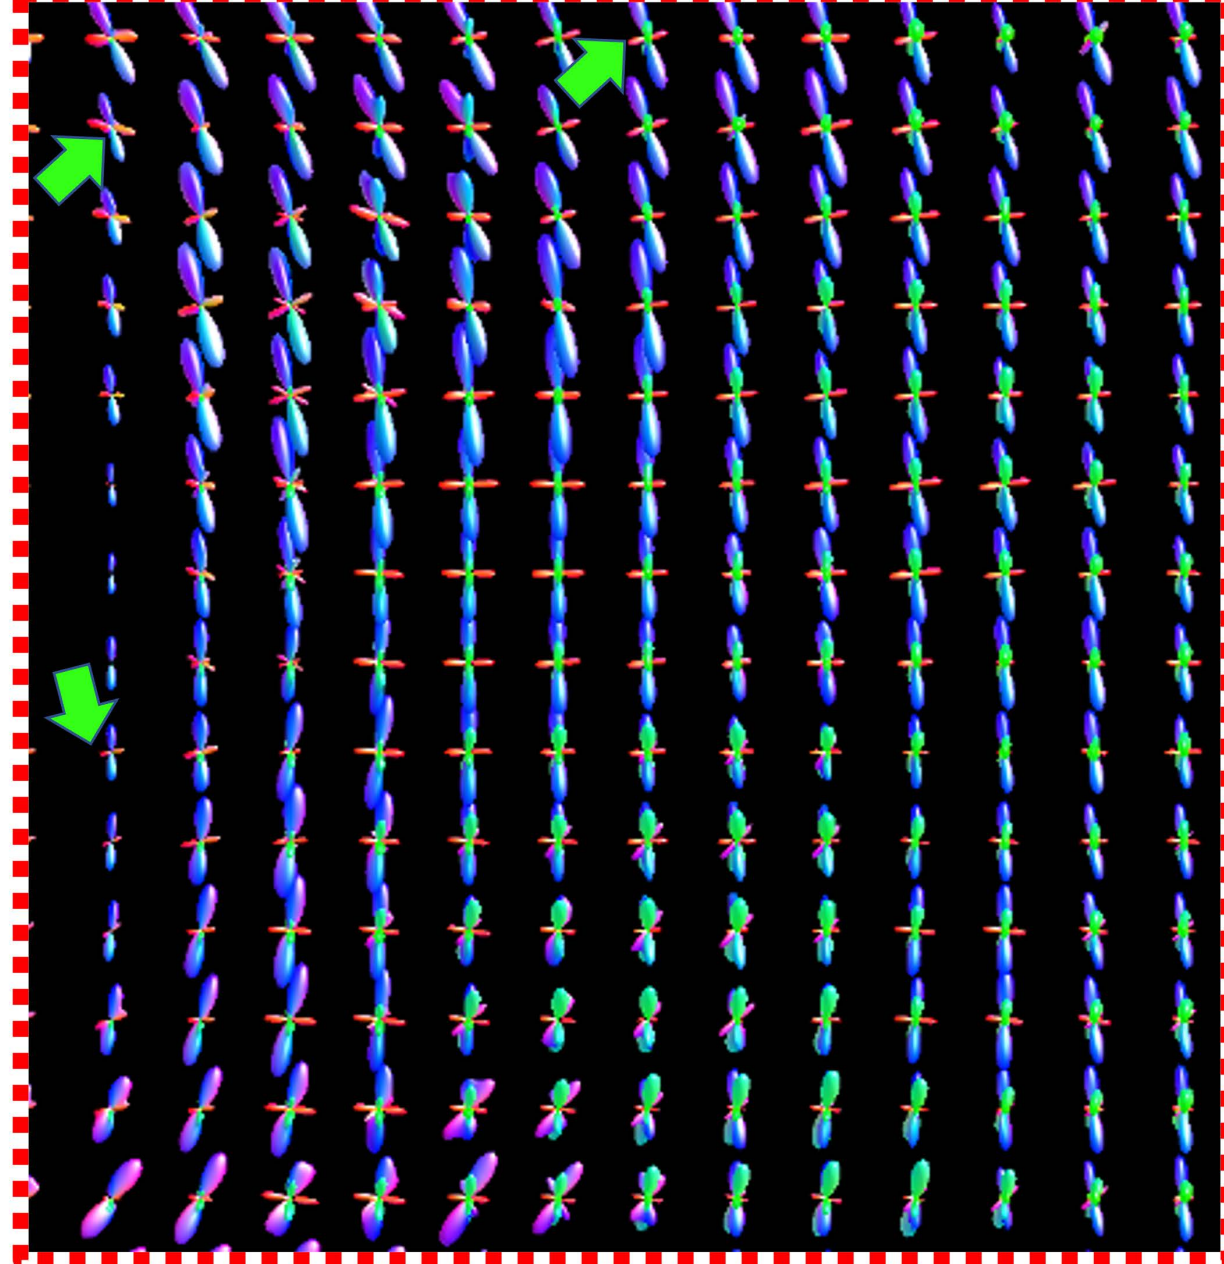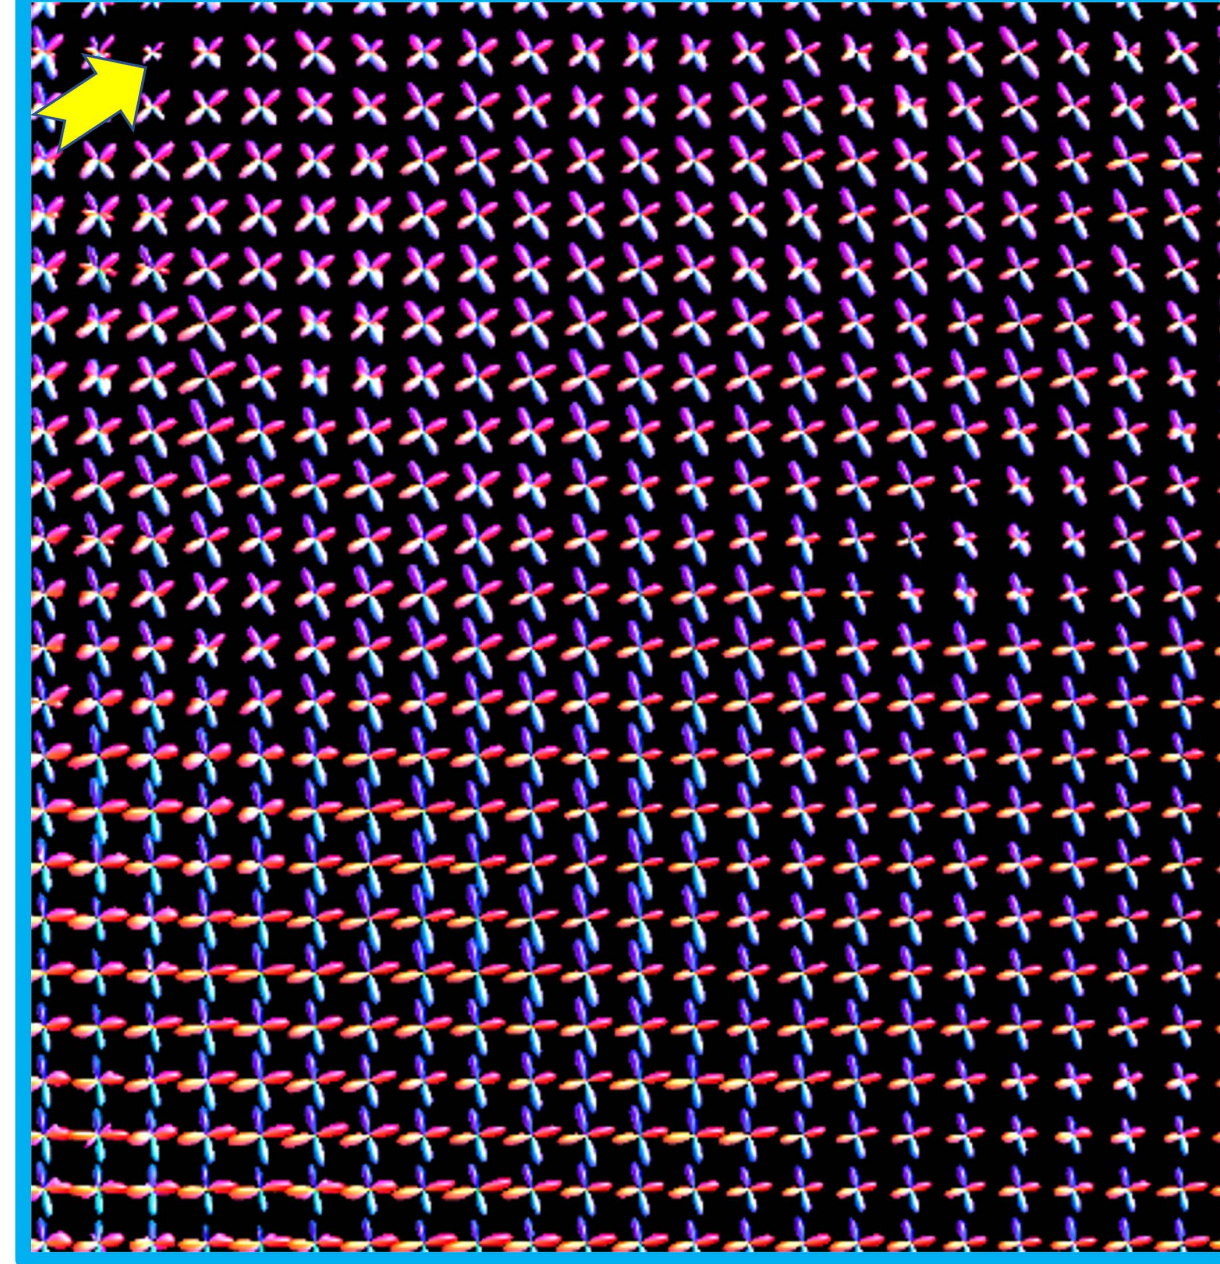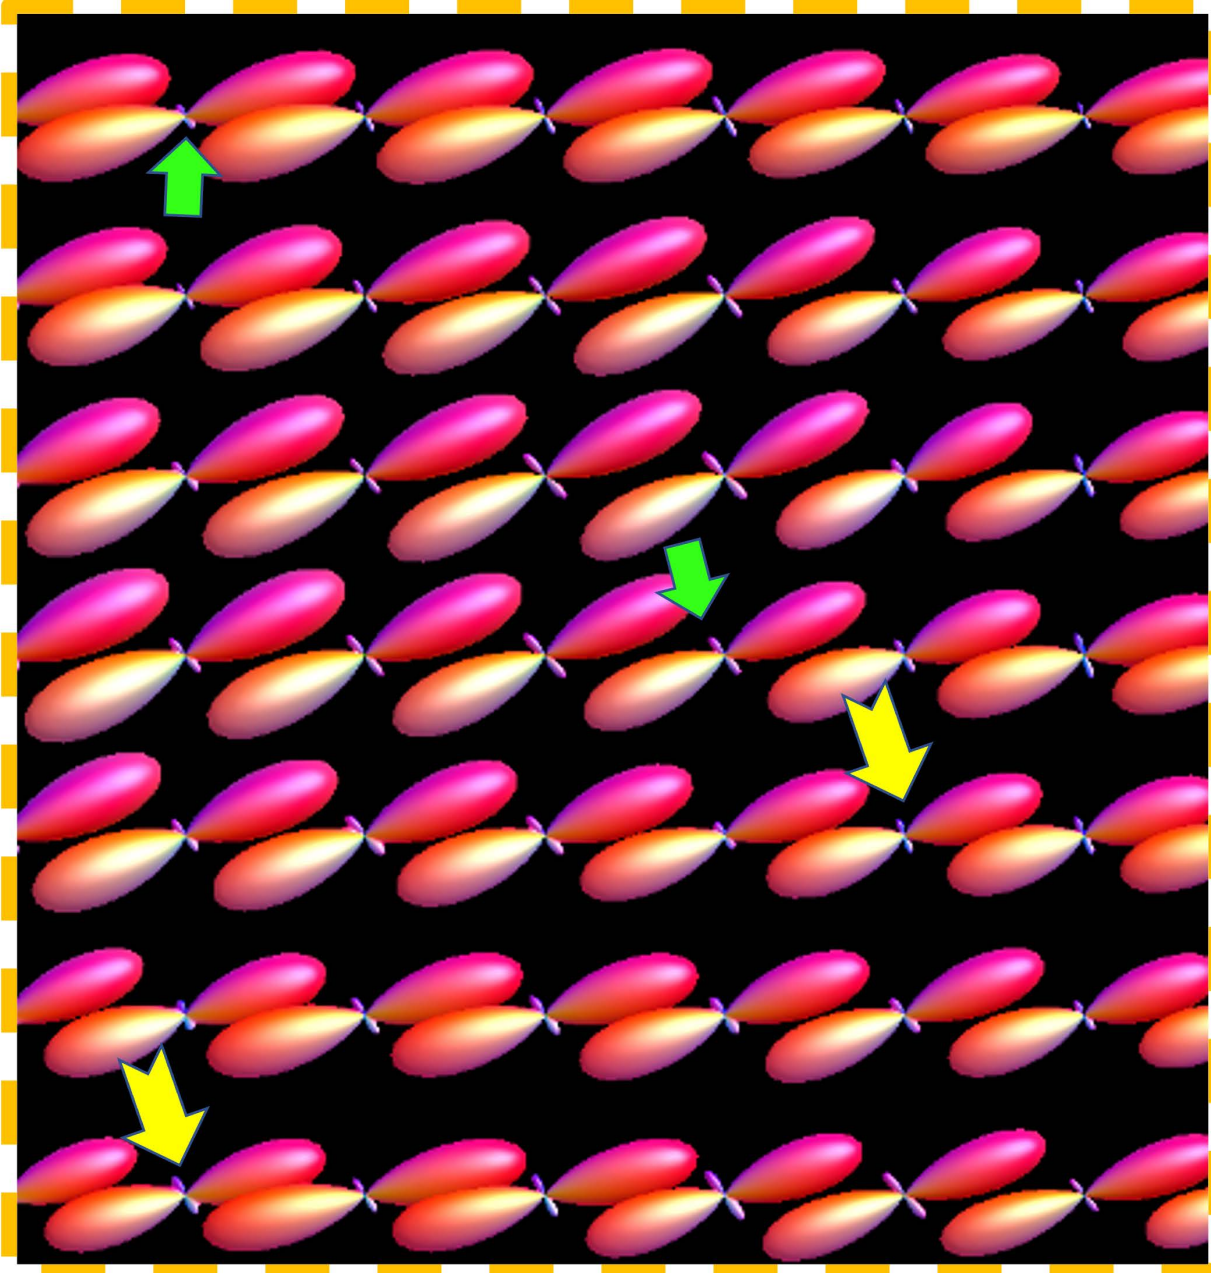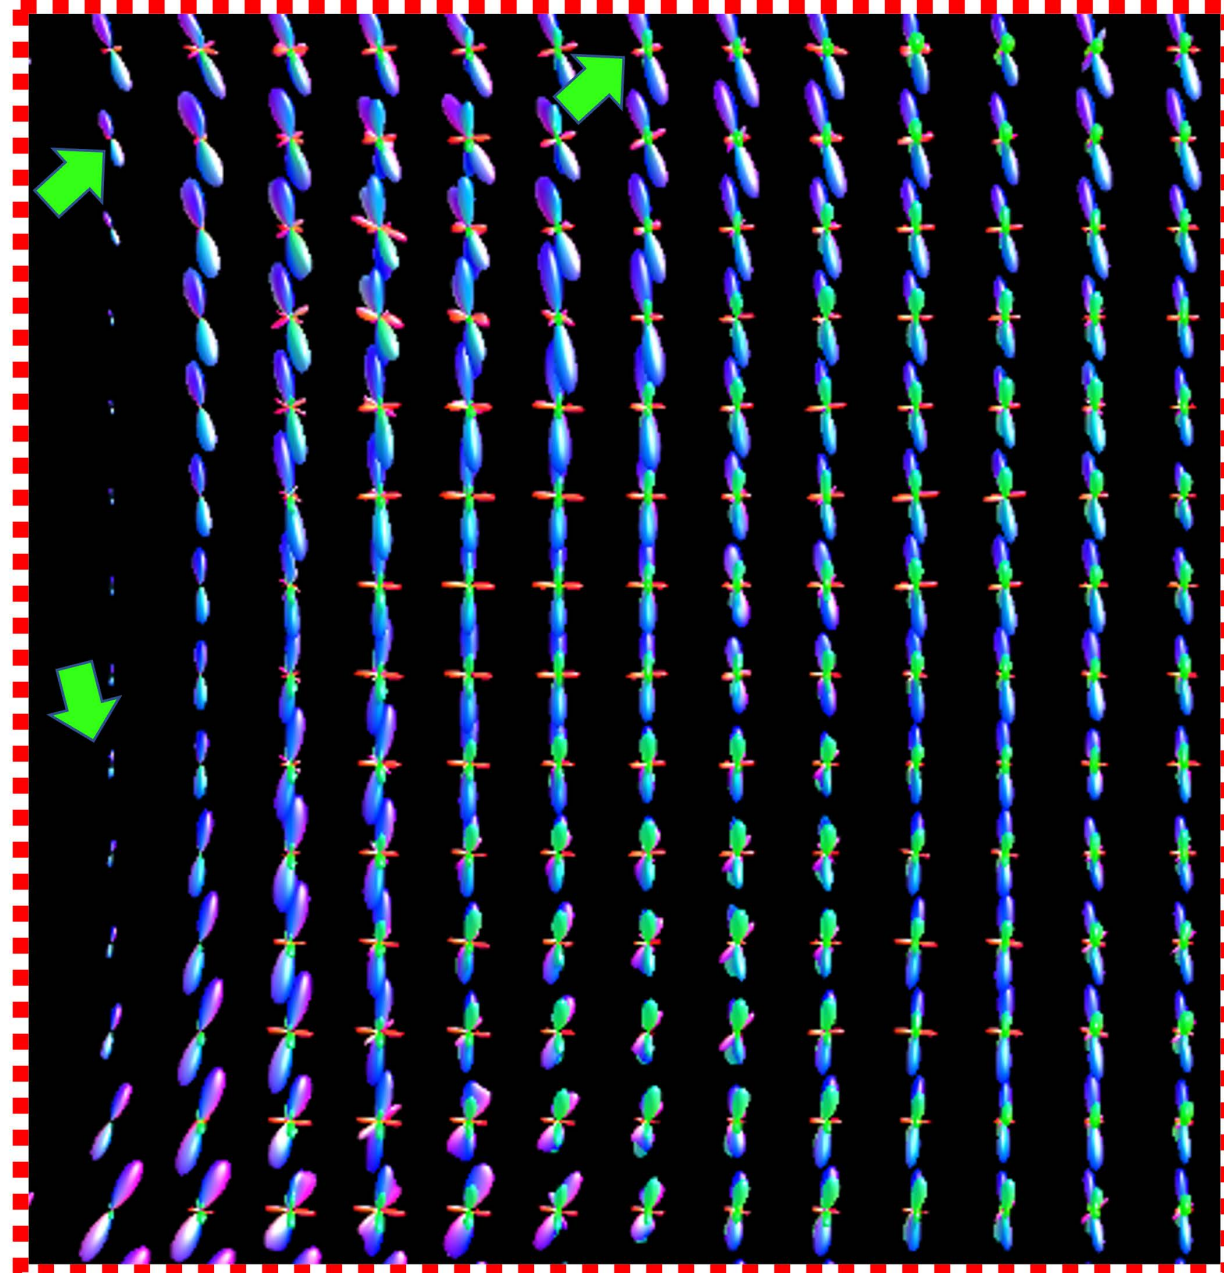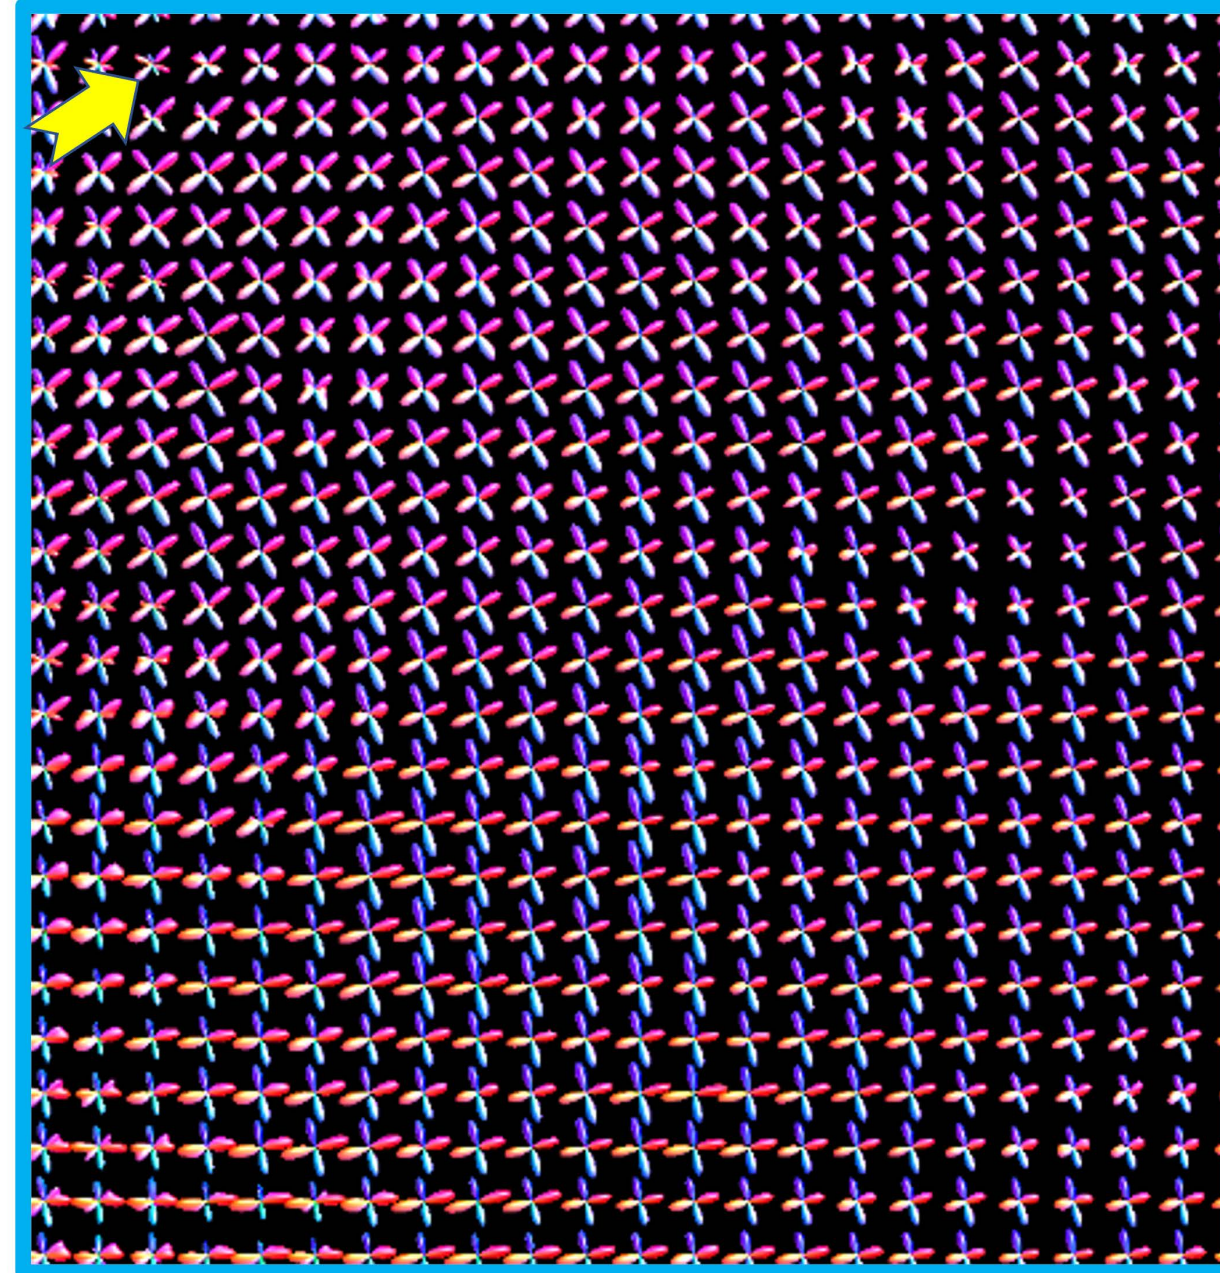

Supplement: supp [file elife-84024-supp-v1.zip]
